# Supplementary material for: A woman’s place is in theatre: women’s perceptions and experiences of working in surgery from the Association of Surgeons of Great Britain and Ireland women in surgery working group
Source: PubMed Central journal article supplement — BMJ Open. 2019 Jan 7;9(1):e024349. doi: 10.1136/bmjopen-2018-024349 (PMC6326292; doi:10.1136/bmjopen-2018-024349), 2019-01-07
Supplement: bmjopen-2018-024349.draft_revisions.pdf [file bmjopen-2018-024349.draft_revisions.pdf]

# BMJ Open

BMJ Open is committed to open peer review. As part of this commitment we make the peer review history of every article we publish publicly available.

When an article is published we post the peer reviewers' comments and the authors' responses online. We also post the versions of the paper that were used during peer review. These are the versions that the peer review comments apply to.

The versions of the paper that follow are the versions that were submitted during the peer review process. They are not the versions of record or the final published versions. They should not be cited or distributed as the published version of this manuscript.

BMJ Open is an open access journal and the full, final, typeset and author-corrected version of record of the manuscript is available on our site with no access controls, subscription charges or pay-per-view fees (<http://bmjopen.bmj.com>).

If you have any questions on BMJ Open's open peer review process please email [info.bmjopen@bmj.com](mailto:info.bmjopen@bmj.com)

# BMJ Open

## **A woman's place is in theatre: women's perceptions and experiences of working in surgery from the ASGBI Women in Surgery working group.**

|                               |                                                                                                                                                                                                                                                                                                                                                                                                                                                                                                                                                                                                                                                                                                                                                                                                                                      |
|-------------------------------|--------------------------------------------------------------------------------------------------------------------------------------------------------------------------------------------------------------------------------------------------------------------------------------------------------------------------------------------------------------------------------------------------------------------------------------------------------------------------------------------------------------------------------------------------------------------------------------------------------------------------------------------------------------------------------------------------------------------------------------------------------------------------------------------------------------------------------------|
| Journal:                      | <i>BMJ Open</i>                                                                                                                                                                                                                                                                                                                                                                                                                                                                                                                                                                                                                                                                                                                                                                                                                      |
| Manuscript ID                 | bmjopen-2018-024349                                                                                                                                                                                                                                                                                                                                                                                                                                                                                                                                                                                                                                                                                                                                                                                                                  |
| Article Type:                 | Research                                                                                                                                                                                                                                                                                                                                                                                                                                                                                                                                                                                                                                                                                                                                                                                                                             |
| Date Submitted by the Author: | 07-Jun-2018                                                                                                                                                                                                                                                                                                                                                                                                                                                                                                                                                                                                                                                                                                                                                                                                                          |
| Complete List of Authors:     | Bellini, Maria Irene; Imperial College Healthcare NHS Trust, Renal Transplant Directorate<br>Graham, Yitka; University of Sunderland Department of Pharmacy Health and Well-being, Science Complex; Sunderland Royal Hospital, Directorate of General Surgery, Bariatric Surgical Unit<br>Hayes, Catherine; University of Sunderland, Faculty of Health Sciences and Wellbeing<br>Zakeri, Roxanna; University College London Hospitals NHS Foundation Trust, General Surgery<br>Parks, Rowan; Royal Infirmary of Edinburgh, Directorate of General Surgery, Hepatobiliary-Pancreatic Surgical Services ; University of Edinburgh Division of Health Sciences, Clinical Surgery<br>Papalois, Vassilios; Imperial College Healthcare NHS Trust, Renal Transplant Directorate; Imperial College London Department of Surgery and Cancer |
| Keywords:                     | SURGERY, gender equity, surgical career, STEM                                                                                                                                                                                                                                                                                                                                                                                                                                                                                                                                                                                                                                                                                                                                                                                        |
|                               |                                                                                                                                                                                                                                                                                                                                                                                                                                                                                                                                                                                                                                                                                                                                                                                                                                      |

SCHOLARONE™  
Manuscripts

**Title:** A woman's place is in theatre: women's perceptions and experiences of working in surgery from the ASGBI Women in Surgery working group.

**Authors:**

Maria Irene Bellini<sup>1</sup> PhD, FEBS, Ass. FACS Post CCT Transplant Fellow  
mariairene.bellini@nhs.net

Yitka Graham<sup>2,3</sup>, PhD, Senior Lecturer in Health Services and NHS Engagement and Researcher in Bariatric Surgery Yitka.Graham@sunderland.ac.uk

Catherine Hayes<sup>2</sup>, PhD, MSc, Reader in Health Professions Pedagogic Practice and Visiting Professor in Higher Education at Universities of Cumbria and Liverpool Hope

Catherine.hayes@sunderland.ac.uk

Roxanna Zakeri<sup>4</sup>, MBBS, MA (Hons) MRCS, General Surgery Specialty Registrar  
roxanna.zakeri@nhs.net

Rowan Parks<sup>5,6</sup>, MD, MB BCh BAO, FRCSI, FRCSEd, Professor of Surgical Sciences Royal Infirmary of Edinburgh r.w.parks@ed.ac.uk

Vassilios Papalois<sup>1,7</sup> KJSJ, MD, PhD, FICS, FRCS, FEBS, Professor of Transplantation vassilios.papalois@nhs.net

1. Renal and Transplant Directorate, Hammersmith Hospital, Imperial College Healthcare NHS Trust, London UK
2. Faculty of Health Sciences and Wellbeing, University of Sunderland, Sciences Complex, Chester Road Sunderland, UK
3. Directorate of General Surgery, Bariatric Surgical Unit, Sunderland Royal Hospital, Sunderland, Kayll Road, Sunderland, UK
4. Department of General Surgery, University College London Hospital NHS Foundation Trust, London, UK
5. Directorate of General Surgery, Hepatobiliary-Pancreatic Surgical Services Royal Infirmary of Edinburgh
6. Department of Clinical Surgery, University of Edinburgh, Edinburgh UK
7. Department of Surgery and Cancer, Imperial College London, London UK

**Corresponding author:**

Maria Irene Bellini, Renal and Transplant Directorate, Hammersmith Hospital, Imperial College Healthcare NHS Trust, London, UK. Email: [Mariairene.bellini@nhs.net](mailto:Mariairene.bellini@nhs.net), Telephone: 0203 3135165

**Abbreviations**

ASGBI: Associations of Surgeons of Great Britain and Ireland

CCT: Certificates of Completion of Training

CV: Curriculum Vitae

LTFT: Less Than Full Time

STEM: Science, Technology, Engineering and Mathematics

WHO: World Health Organization

Keywords: surgery, gender equity, surgical career, STEM

**Abstract Word count 300**

**Objective:** Surgery remains an inherently male-dominated profession. The aim of this study was to survey women working within the discipline, to understand their current perceptions, to provide insight into their practical day-to-day lives, supporting an action-oriented change.

**Design and Setting:** The link to a confidential, on-line survey was distributed through the Association of Surgery of Great Britain and Ireland (ASGBI) social media platforms on Facebook and Twitter over a two-week period in October 2017.

**Participants:** Women working in the field of surgery and actively responding to the link shared through the ASGBI social media platforms. No patients were involved in the study.

1  
2  
3 **Primary and Secondary Outcome measures:** Data were analysed through a mixed  
4 methods approach. The quantitative data was analysed through descriptive  
5 statistics and qualitative analysis was undertaken using a constant comparative  
6 analysis of the participants' comments, to identify salient patterns (themes).  
7  
8  
9

10  
11  
12  
13 **Results:** A total of 81 female participants replied (42% response rate from Facebook  
14 members), with 88% (n=71) perceiving surgery as a male-dominated field. Over half  
15 had experienced discrimination (59%,n=47), whilst 22% (n=18) perceived a 'glass  
16 ceiling' in surgical training. Orthopaedics was reported as the most sexist surgical  
17 specialty by 53% (n=43). Accounts of gendered language in the workplace were  
18 reported by 59% (n=47), with 32% (n=25) of surveys participants having used it.  
19 Overall, a lack of formal mentorship, inflexibility towards part-time careers, gender  
20 stereotypes and poor work-life balance were the main perceived barriers for women  
21 in surgical careers.  
22  
23  
24  
25  
26  
27  
28  
29  
30  
31  
32  
33  
34

35 **Conclusion:** These findings highlight the implicit nature of the perceived  
36 discrimination that women report in their surgical careers. The ASGBI acknowledges  
37 these perceptual issues and their relative implications as the first of many steps to  
38 create an action-oriented change by allowing all staff, regardless of gender, to reflect  
39 on their own behaviour, perceptions and the culture in which they work.  
40  
41  
42  
43  
44  
45  
46

47 **Trial registration:** not applicable  
48  
49

50 **Article Summary:**  
51  
52  
53  
54  
55  
56  
57  
58  
59  
60

1  
2  
3 The key aim of this study was to capture the perceived factors potentially deterring  
4 women from pursuing a surgical career in a clinical and academic environment in  
5 order to achieve gender equity within the profession.  
6  
7

8  
9  
10 To illustrate these factors as a source of reflection for surgical staff of either gender,  
11 for policy makers and for professional bodies such as the Association of Surgeons of  
12 Great Britain and Ireland (ASGBI), could help to move beyond tokenism in the co-  
13 construction of relevant, impactful and evidence-based action.  
14  
15

16  
17  
18 The results of a voluntary, confidential, on-line survey through the ASGBI social  
19 media platforms were analysed through a mixed methods approach of quantitative  
20 statistics and qualitative thematic analysis.  
21  
22

23  
24  
25 The socio-cultural aspects of the surgical profession were discussed and presented  
26 along with the initial action-oriented changes.  
27  
28  
29

30  
31 **Article Word count 3940**  
32

### 33 34 35 **Introduction** 36

37  
38 Despite annual intakes of medical school cohorts evidencing a 55% female  
39 contingent, only 28% of these women eventually pursue a career in surgery via  
40 higher surgical training in the UK (1). Beyond these baseline figures, a qualitative  
41 analysis of the factors deterring women from pursuing surgery as a career in the  
42 western countries is needed as an adjunct to the existing evidence base. In reality,  
43 several extraneous variables rooted in socio-cultural backgrounds, such as toy-  
44 makers sometimes blatantly but more often inadvertently, discourage girls from  
45 studying science, technology, engineering and mathematics (STEM) (2), as do some  
46 of their teachers (3). It is evident that some girls lack role models in these fields and  
47  
48  
49  
50  
51  
52  
53  
54  
55  
56  
57

1  
2  
3 grow up with the unfounded pre-supposition they would not do well in those,  
4 considered male and technical professions(4). This ultimately influences their  
5 intrinsic motivation and their resultant capacity to succeed in fields like surgery, due  
6 to the perception that these careers require self-selected individuals who are driven,  
7 competitive, and able to endure years of intense schooling and high expectations (5).  
8  
9

10  
11 Although there is acknowledgement of the longstanding historical contribution to  
12 surgical practice from women (6, 7) the manner in which women feel perceived by  
13 their male counterparts is under-evidenced and little reported. The key aim of this  
14 study is to capture the perceived barriers in the experiences of women working  
15 within the field of surgery and to use them as a source of reflection. This should  
16 provide an important focus for surgical staff of either gender and for policy makers  
17 who may need an insight into the practical day to day lives of women undertaking  
18 roles in the surgical profession. Acknowledging these issues is the first of many  
19 steps to addressing their implication to the surgical workforce, regardless of gender.  
20 Alongside this is the need for critical introspection, a topic that has been much  
21 debated in the research aiming to take action (8) and in which surgeons, due to the  
22 functional role they undertake, should be more often involved (9).  
23  
24  
25  
26  
27  
28  
29  
30  
31  
32  
33  
34  
35  
36  
37  
38  
39  
40  
41

## 42 **Methods**

43  
44 The link to a voluntary, confidential, on-line survey was distributed through the  
45 Association of Surgery of Great Britain and Ireland (ASGBI) Women In Surgery  
46 social media platforms of Facebook (191 members) and shared via Twitter for a two  
47 week period in October 2017. Weekly reminders were posted. The Facebook site  
48 (10) is a closed group comprised of healthcare professionals working in the field of  
49 surgery. Given the sensitivity of the topic, the closed access to the social media  
50  
51  
52  
53  
54  
55  
56  
57  
58  
59  
60

1  
2  
3 platforms, and the wish to ensure honest, open responses and anonymity, no  
4 demographic information was collected. No patients were involved in the study.  
5  
6  
7

8 The questions were designed to understand whether barriers exist to deter women  
9 from pursuing surgery as a career, and if so, what these barriers are and what  
10 interventions would be suggested in order to reduce them. Respondents were  
11 encouraged to provide their personal opinions throughout the free text boxes after  
12 each question. As the aim of the research was to obtain as many responses as  
13 possible, whilst understanding the participants' experiences of being a female  
14 working in surgery, a mixed methods approach was used. The quantitative data was  
15 analysed through descriptive statistics, and to provide context to this data and more  
16 fully explore the participants' responses, a qualitative approach was taken using  
17 constant comparative analysis of the participants' comments, to identify patterns  
18 (themes) within the responses. This was guided by the principles of thematic  
19 analysis (11), using a six step process of data familiarisation, generating initial  
20 codes, searching for themes, reviewing themes, defining and naming themes and  
21 producing the report.  
22  
23  
24  
25  
26  
27  
28  
29  
30  
31  
32  
33  
34  
35  
36  
37  
38

### 39 **Results**

40 A total of 81 participants completed the survey, an estimated response rate of 42%  
41 based on the Facebook group membership. It was not possible to determine how the  
42 Twitter platform influenced response rate. The 88% (n=71) felt that surgery remains  
43 a male-dominated field, with 59% (n=47) reporting or witnessing discrimination  
44 against females in the workplace. The hidden barriers for women reported by 34%  
45 (n=28) were that the profession was not conducive to motherhood and family life,  
46 with 16% (n=13) citing childcare issues. There was a perception that the surgical  
47  
48  
49  
50  
51  
52  
53  
54  
55  
56  
57  
58  
59  
60



profession and culture was male-oriented, conceptualised as an 'old boys club' (16%, n=33) and possessing a masculine attitude and negative bias (13%, n=9). The framework for a career in surgery was reported as lacking flexibility and part-time careers (12%, n=10), with 10% (n=8) citing unsocial hours and working patterns (see Table I).

**Table I Participant-perceived barriers to a career in surgery**

| No. | Barrier                                                                   | Response      |
|-----|---------------------------------------------------------------------------|---------------|
| 1   | Not a profession conducive with motherhood, family and children           | 34% (n=28)    |
| 2   | Childcare issues                                                          | 16%(n=13)     |
| 3   | 'Old Boys' Club/network                                                   | 16% (n=13)    |
| 4   | Male attitudes/bias                                                       | 13%(n=11)     |
| 5   | Culture of surgery as a masculine field                                   | 12%<br>(n=10) |
| 6   | Unconscious bias                                                          | 12%(n=10)     |
| 7   | Lack of flexible/part-time training                                       | 12%(n=10)     |
| 8   | Unsocial hours/working patterns/rotas                                     | 10%(n=8)      |
| 9   | Perceptions by Nurses and Patients that women are not able to be surgeons | 7%(n=6)       |
| 10  | Respondent skipped question                                               | 7%(n=6)       |
| 11  | Maternity leave/career break                                              | 6%(n=5)       |
| 12  | Women are excluded from 'male-only' social events                         | 6% (n=5)      |
| 13  | Women less confident in their abilities                                   | 5%(n=4)       |
| 14  | Lack of female role models                                                | 5%(n=4)       |
| 15  | Men have more variety in surgical career choices                          | 5%(n=4)       |
| 16  | No barriers                                                               | 4%(n=3)       |
| 17  | Male surgeons behaving inappropriately                                    | 4%(n=3)       |
| 18  | Patients prefer male surgeons                                             | 4%(n=3)       |
| 19  | Image of female surgeons as being on par with a nurse                     | 2%(n=2)       |
| 20  | Perceptions that women will want a less onerous career                    | 2% (n=2)      |
| 21  | Social barriers                                                           | 2%(n=2)       |
| 22  | Barriers are explicit, not hidden                                         | 2%(n=2)       |
| 23  | Lack of flexibility                                                       | 2%(n=2)       |
| 24  | Women need to be seen as ruthless in order to succeed                     | 2%(n=2)       |
| 25  | Women need to pull their weight like a man                                | 2%(n=2)       |
| 26  | Hard for women to establish a private practice                            | n=1           |
| 27  | Personal expectations                                                     | n=1           |
| 28  | Historical/traditional expectations of women                              | n=1           |

The concept of a 'glass ceiling' for women within the surgical profession was raised, with 44% (n=36) feeling this did not exist. All 81 participants answered this question,

with 21% (n=17) feeling there was a tangible glass ceiling. The remaining 35% (n=28) chose not to comment.

Respondents were also asked if a glass ceiling existed at any particular levels during surgical training, with 9% (n=7) stating that this was evident at all levels; 6% (n=5) referred women underrepresentation at consultant role with different treatment compared to males.

Given the lack of women in surgical careers, participants were asked to comment on why women may be attracted to other clinical specialties. The most frequent responses (26%, n= 21) were quality of life/work-life balance and less unsocial hours (15%, n= 12) (see Table II).

**Table II Benefits of working in non-surgical specialties for women**

|                                                                 |            |
|-----------------------------------------------------------------|------------|
| Quality of life/flexibility/work and life balance               | 26% (n=21) |
| More accepting of part-time/less than full time training (LTFT) | 17% (n=14) |
| Less unsocial hours                                             | 15%(n=12)  |
| More role models/mentoring                                      | 15% (n=12) |
| Accepting of childcare and family commitments                   | 10% (n=8)  |
| Less macho/male attitudes                                       | 7% (n=6)   |
| Less on call                                                    | 7% (n=6)   |
| Less intimidating reputation/less competitive                   | 6% (n=5)   |
| Other                                                           | 21% (n=17) |
| Not sure/don't know                                             | 16% (n=13) |
| Respondent skipped question                                     | 7% (n=6)   |

When asked what could be done to attract more women to the surgical professions, nearly half (42%, n=34) cited improved quality of life, and flexibility in part-time pathways with career and training options (see Table III).

**Table III What could surgery do to attract more women to the profession?**

|                                                                                                                                                                                                     |            |
|-----------------------------------------------------------------------------------------------------------------------------------------------------------------------------------------------------|------------|
| Flexible training and career options (e.g. part-time, LTFT)                                                                                                                                         | 42% (n=34) |
| Project a less masculine image/address this                                                                                                                                                         | 25% (n=20) |
| Improve the work/life balance                                                                                                                                                                       | 18% (n=15) |
| More female mentors/role models                                                                                                                                                                     | 18% (n=15) |
| More team/collaborative approaches                                                                                                                                                                  | 7% (n=6)   |
| Financial support of trainees                                                                                                                                                                       | 6% (n=5)   |
| Respondent skipped question                                                                                                                                                                         | 6% (n=5)   |
| Others(<4 responses)<br>Don't know<br>Nothing<br>Sessional work<br>Less overbooking<br>Less focus on service provision<br>More positions in larger cities<br>Remove perception of the need for PhDs | 23% (n=19) |

Although there is existing support for women in surgery, such as Less Than Full Time (LTFT) training and maternity leave, the dearth of women in surgical professions may demonstrate that there is a need for additional support mechanisms. Over 30% of respondents felt that LTFT training was perceived negatively, and this needed to be addressed. There was also a reported need to reduce stigma associated with women taking career breaks (22%, n=18) and to increase understanding of the impact of family on day-to-day activities (18%, n=15) in surgical practice (see Table IV).

**Table IV What other support (aside from LTFT and maternity leave) is needed for women in surgery?**

|                                                                          |            |
|--------------------------------------------------------------------------|------------|
| Change the negative perceptions of LTFT                                  | 32% (n=26) |
| Reduce the perceived stigma associated with women who take career breaks | 22% (n=18) |
| Increase understanding of the perceived                                  | 18% (n=15) |

|                                                                                                         |             |
|---------------------------------------------------------------------------------------------------------|-------------|
| impact of family on day to day work activities and support this                                         |             |
| Encourage men to take LTFT                                                                              | 15% (n=12)  |
| Not sure                                                                                                | 13%, (n=11) |
| Career break                                                                                            | 13%, (n=11) |
| On site childcare                                                                                       | 7%, (n=6)   |
| More awareness and promotion of rules, regulations and support of gender equality and support for women | 6% (n=5)    |
| Nothing needed                                                                                          | 6% (n=5)    |
| Modular training                                                                                        | 6% (n=5)    |
| Other                                                                                                   | 26% (n=21)  |

To further explore the perceptions of a male-dominated surgical culture, participants were asked to list the specialties in which this dominated. More than half (53%, n=43) felt that Trauma and Orthopaedics was a sexist (12) specialty, followed by Cardiothoracic (16%, n= 13) and General Surgery (15%, n=12), with 15% reporting no surgical specialty as being more sexist than another (see Table V).

**Table V Participant reported sexist surgical specialties**

| <b>Surgical specialty</b> | <b>Reponses</b> |
|---------------------------|-----------------|
| Orthopaedics/Trauma       | 53% (n=43)      |
| Cardiothoracic            | 16% (n=13)      |
| General surgery           | 15% (n=12)      |
| Not sure/don't know       | 15% (n=12)      |
| Urology                   | 5% (n=4)        |
| None                      | 4% (n=3)        |
| Vascular                  | 4% (n=3)        |
| Neurosurgery              | 4% (n=3)        |
| Hepatobiliary             | N=1             |
| Plastics                  | N=1             |
| All                       | N=1             |
| Leading question          | N=1             |
| Skipped question          | 11% (n=9)       |

Much of a culture is underpinned and shaped by the language used. Over half of respondents (58%, n=47) felt that gendered language exists within surgery. A quarter of the respondents confessed to having used gendered language themselves, but over half (52%, n=41) had not used it, with gendered language not affecting career choices for 87% (n=70%). The most common method of challenging gendered language was to speak out (21%, n=17), but 18% (n=15) had not encountered any incidences (see Table VI).

**Table VI Challenging sexist language in the workplace**

| Action                                                | Response   |
|-------------------------------------------------------|------------|
| Speaking up/correcting/stating inappropriate language | 21% (n=17) |
| Not experienced sexist language                       | 18% (n=15) |
| Humour                                                | 9% (n=7)   |
| Correcting/stating inappropriate language             | 9%(n=7)    |
| Find it difficult                                     | 7% (n=6)   |
| Non-confrontational approach/social media             | 2% (n=2)   |
| Not able to interpret response                        | 10%(n=8)   |
| Ignore/refuse to respond                              | 7%(n=6)    |

When asked what advice they would give to others when encountering gendered language, the most common recommendation was to confront or speak to the person (51%, n=41), with 17% (n=14) advising correction of the language used (see Table VII).

**Table VII Advice to colleagues on dealing with sexist language in workplace environments**

| Advice                            | Response   |
|-----------------------------------|------------|
| Confront/speak to person involved | 51% (n=41) |
| Correct the language used         | 17%(n=14)  |
| Respondent did not answer         | 12% (n=10) |

|   |                                                                                                                                                       |           |
|---|-------------------------------------------------------------------------------------------------------------------------------------------------------|-----------|
| 1 | Deflect using humour                                                                                                                                  | 11% (n=9) |
| 2 | Do not accept/remain silent                                                                                                                           | 10%(n=8)  |
| 3 | Ignore                                                                                                                                                | 9% (n=7)  |
| 4 | Be aware that people may not be aware they are using sexist language/don't make an issue out of it (unless 'over the line')/don't be overly sensitive | 7% (n=6)  |
| 5 | Seek support from others/support others                                                                                                               | 7% (n=6)  |
| 6 | Don't know/no advice                                                                                                                                  | 4% (n=3)  |
| 7 | File complaint                                                                                                                                        | 3% (n=2)  |
| 8 | Demand apology                                                                                                                                        | n=1       |
| 9 | Treat as bullying                                                                                                                                     | n=1       |

### **Thematic Analysis**

There was an overarching theme of participants feeling constrained within the present surgical environment, which appears to be better equipped to support males, with sociocultural norms embedded in masculine discourses. The participants appeared to make efforts to fit into the environment, adapting a variety of stances to do this. The constraints were conceptualised as conflicting personal and career decisions, under-representation, a relative rigidity in surgical career structures, and the process of discrimination, both active and nuanced (self and others), that exists in current surgical practice. These themes are supported by in-vivo quotes from the data:

#### **Conflict between personal and career decisions**

*'Trainees have families and other responsibilities to manage as well as surgical training'*

*'At registrar level, many women switch to GP training for family reasons'*

*'Maybe there is a glass ceiling, as the training scheme is long. When you want to have a family you are at senior level for jobs. It's harder to stay focused on career and your curriculum vitae (CV). This affects the quality of your CV at interview for consultancy. Somehow, it's easier for wives to follow their surgeon husbands rather than for husbands to follow surgeon wives'*

1  
2  
3 *'I am horrified by the stories of women in the first trimester of pregnancy with*  
4 *morning sickness vomiting several times between procedures during a list,*  
5 *and women in the third trimester doing nights, etc., especially when they want*  
6 *to switch to a less physically intense session'*  
7  
8  
9

### 10 11 **Under-representation**

12  
13  
14 *'Up until recently, there were no women in my sub-specialty'*  
15

16 *'Now that I am a consultant, I feel massively in the minority '*  
17  
18  
19

### 20 21 **Rigidity in surgical career structures**

22  
23 *'Reduce the hierarchal nature of surgical training; this would improve safety*  
24 *and morale for all'*  
25

26 *'There needs to be a real understanding that having a small child really*  
27 *hinders the ability to do things like extra work that needs to be completed out*  
28 *of hours. If there was a way to come back into training but have a pause on in*  
29 *counting towards your time up then there would be less financial and*  
30 *timescale stress'*  
31

32 *'Flexible training and to stop having such rigid pathways to CCT (Certificates*  
33 *of Completion of Training), different paths are ok and valid. We also need true*  
34 *competency based training – some people will complete faster than 5/6 years,*  
35 *others might need longer. Be more open to time out.'*  
36

37 *'There's an implicit assumption that surgeons will be able to have their*  
38 *families trail around the country after them for jobs and fellowships.*  
39 *Realistically this is less possible for women with professional partners and*  
40 *small children. Women are presumed to deskill during maternity leave and*  
41 *discouraged from working part-time.'*  
42  
43  
44

### 45 **Discrimination: self**

46  
47 *'Generally, women are less confident in their abilities, whereas men are more*  
48 *confident...often holds females back'*  
49

50 *'Some women try and take advantage way over expected norms and use it to*  
51 *bargain for favours which make things worse'*  
52  
53  
54  
55

### 56 **Discrimination: others**

1  
2  
3 *'People see a glass ceiling, actually you can get in, but you are treated*  
4 *differently, so really a glass cliff'*

5  
6 *'You're an unlikely looking orthopod'*

7  
8 *'I find the surprise and confusion and refusal to believe I'm an orthopod e.g.*  
9 *'you're too nice to be an orthopod' and 'that's not something to be proud of'*  
10 *very frustrating'*

11  
12 *'I recently presented a paper at a plenary session at a UK surgical meeting. I*  
13 *was the only female presenter. I got equal marks as the top male candidate*  
14 *(announced at the podium by the head of the society) but the prize was given*  
15 *to the male and the prize was a tie'*

16  
17  
18 *'I have done the World Health Organization checklist and then had the*  
19 *comment 'we need to wait for the surgeon' despite having introduced myself*  
20 *as the surgeon'*

21  
22 *'I got told by another surgeon that he left vascular surgery for plastics*  
23 *because there were 'too many women surgeons and they caused too much*  
24 *drama'.'*

25  
26  
27  
28  
29 There were reported accounts of patients using gendered language with implicit  
30 assumptions that female surgeons were not acceptable, or that being female was not  
31 associated with being a surgeon:  
32

33  
34  
35  
36 *'Patients don't think women can be doctors, let alone surgeons'*

37  
38  
39  
40 *'Significantly more patients call me nurse or lady doctor than any of my*  
41 *colleagues'*

42  
43  
44 *'Patients are often shocked that I will be doing their operation, and I have led*  
45 *ward rounds where the patients have talked to my tall male F1 and not me'*

46  
47 *'Patients are extraordinarily sexist e.g. patients have walked into a consulting*  
48 *room and said to me 'I thought I would be seeing a doctor at least' before I*  
49 *had time to introduce myself. I am 34 and been a doctor for 10 years'*

50  
51  
52  
53 Perceived implicit discrimination was reported, but could not be proven:  
54  
55  
56  
57  
58  
59  
60



1  
2  
3 *'I had difficulty trying to get a consultant job. Although I was already working*  
4 *as a locum consultant, I lost out many times to younger men who were all*  
5 *registrars. Various reasons were cited, but I did begin to wonder if my face*  
6 *didn't fit. Until a couple of years ago, there were no women in my particular*  
7 *subspecialty'*

8  
9 *'Improve the stigma that is sometimes attached to women who choose to take*  
10 *time out of their careers for children. Many women I've spoken to say they*  
11 *aren't viewed as competent as their full time colleagues'*

12  
13 *'We lose out on consultant posts to younger males'*

14  
15 In the physical workplace, there was an account of discrimination:

16  
17  
18 *'I am the only female Consultant General Surgeon in my Trust. I'm not*  
19 *allowed in the consultant changing room. There is one consultant changing*  
20 *room and it is for men only'*

21  
22 Accounts of discrimination were supported by other healthcare staff:

23  
24  
25 *'Theatre staff have commented that male surgeons get more opportunities in*  
26 *theatre than female'*

27  
28 There were also reports of female surgeons being discriminated against by other  
29 non-surgical staff:

30  
31 *'The secretaries in my Trust do not do as much for the female consultants as*  
32 *they are perceived as having taken a 'man's job'.'*

## 33 34 35 **Discussion**

36 This survey, conducted through the ASGBI social media platforms, illuminates the  
37 lived realities of female surgeons in the UK today. Gender bias and discrimination  
38 were reported by 59% of the participants irrespective of level of training and  
39 experience, suggesting an ancient culture pervading our society since the 1800s, at  
40 the time of the first female surgeon in the UK, Elizabeth Garrett (18, 19).

41  
42  
43  
44  
45  
46  
47  
48 The greatest perceived barrier to women wanting to pursue and persist with a career  
49 in surgery was incongruity with motherhood and childcare commitments (50%).  
50 Literature reports a significant level of attrition for women in surgical training (12),  
51 traditionally seen as one of the most competitive and time-consuming specialties

1  
2  
3 (13) with the perception that spending less time in surgical training would  
4  
5 compromise competency achievement (14). Furthermore, there is discrepancy on  
6  
7 parental leave policies across hospital trusts and specialties, despite widespread  
8  
9 recognition that better support for parents engenders marked benefits for the health  
10  
11 and wellbeing of doctors, their children and ultimately healthcare provision (15). This  
12  
13 lack of support is potentially leading to burnout, since we know that this is ultimately  
14  
15 driven by external factors such as excessive working hours, workload and conflicts  
16  
17 with family commitments (16, 17). Thus, for some women, the only perceived option  
18  
19 to preserve their own mental health is represented by withdrawing from surgical  
20  
21 training.  
22  
23

24  
25 How do we create the change needed? Encouraging and tangible signs of an  
26  
27 already emergent cultural change, like day-care facilities and childcare options, are  
28  
29 reflected in the wider societal acknowledgement of women in surgery. One example  
30  
31 is the New Year's Honours List, where the Royal College of Surgeons of England  
32  
33 past president, and first female president, Clare Marx, received a damehood in  
34  
35 acknowledgement of her contribution to surgical practice. In addition to this, Jackie  
36  
37 Taylor has been chosen as president-elect of the Royal College of Physicians and  
38  
39 Surgeons of Glasgow for the first time in its 418-year history, where, for the first time,  
40  
41 there is also a female surgical vice-president, Alison Lannigan. Whilst these women  
42  
43 are atypical and not necessarily representative of all women in surgery, they act as  
44  
45 positive role models for women in the context of career progression. We need  
46  
47 strategic encouragement and education about the realities of leadership roles in  
48  
49 STEM, along with instigation of evidence-based and effective schemes for gender  
50  
51 equality in the workplace, such as the ATHENA SWAN for academic careers (18).  
52  
53  
54  
55  
56  
57  
58  
59  
60

1  
2  
3 Visibility of role models is key to increasing current female training rates and public  
4  
5 advocacy campaigns through social media facilitate education and awareness of  
6  
7 culturally sensitive matters. To this end, the ASGBI launched a Facebook group(10)  
8  
9 to bring individuals together for networking and communications about women in  
10  
11 surgery, parenting and work-life balance (10). As primary communication methods,  
12  
13 social media are increasingly integrated into the daily routine of individuals personal  
14  
15 activity and practice, with 68% of women and 62% of men using them (19). We aim  
16  
17 to be what we see or what we deal with in our daily practice (20). The ASGBI  
18  
19 #HowIBecameAWomanInSurgery” campaign was created on this basis to shine light  
20  
21 on the journey through the training pathways of female surgeons. Sharing their  
22  
23 journeys aims to inspire and support other members, allowing them to see how  
24  
25 frequently encountered barriers were overcome from different perspectives(21).  
26  
27 Evidence of the benefits of mentoring to support women as they progress in their  
28  
29 careers is plentiful (22) Interestingly, this survey revealed great awareness of the  
30  
31 benefits of mentoring amongst female surgeons but a view in 15% that it currently  
32  
33 remains an advantage to be gained primarily in non-surgical specialties.  
34  
35  
36

37  
38 Finally, personality traits and behaviours adopted by surgeons are often perceived  
39  
40 differently depending on a surgeon’s gender, which can have significant impact on  
41  
42 an individual’s confidence and self-reflection. Respondents to this survey noted  
43  
44 being labelled as ruthless in order to succeed (2%), pressured to ‘pull their weight  
45  
46 like a man’ (2%) and admitted a lack of confidence in their ability (5%). Women excel  
47  
48 in some areas more typically difficult for their male counterparts, including  
49  
50 communication, collaboration, and patient centeredness (23). Recent analysis of  
51  
52 over 100,000 surgical patients in Canada, found that those who were operated on by  
53  
54 female surgeons were less likely to die one month after their procedure (24),  
55  
56  
57  
58  
59  
60

1  
2  
3 mirroring a previous study according to which female internal medicine doctors had  
4 slightly lower rates of death within 30 days of initial hospitalisation (25). Those data  
5 need adequate dissemination amongst healthcare professionals and general  
6 population, as in our survey the glass ceiling for women is also represented by  
7 nurses and patients (7%).  
8  
9

10  
11  
12  
13 This study builds on the global commitment for greater female representation and  
14 support in STEM. The greatest challenge currently faced, in the opinion of the  
15 authors, is the realisation and elimination of unconscious bias existing in surgery.  
16  
17  
18  
19  
20  
21  
22  
23  
24  
25  
26  
27  
28  
29  
30  
31  
32  
33  
34  
35  
36  
37  
38  
39  
40  
41  
42  
43  
44  
45  
46  
47  
48  
49  
50  
51  
52  
53  
54  
55  
56  
57  
58  
59  
60

Gender equity is a leadership issue: when more women are in leadership positions, organisations offer employees more generous policies to support workplace gender (26, 27) and produce better business results (28).

Cultural change requires a nucleus of organisational catalysts who are insiders with outsiders' cultural beliefs (29). In today's workplace, these are colleagues at every level of power and leadership acting to call out insults and affronts, eliminate pay and promotion disparities, and advocate for policies that retain a diverse talent pool. Male surgeon colleagues who already mentor and support females are appreciated, but women, also need to step up and promote themselves (30). The glass ceiling for women in science is created by people, of either gender, and it can only be broken if all are aware of it and change their behaviour and attitude towards it.

### **Limitations**

Despite a high response rate, the participants had responded to social media requests through ASGBI, therefore the findings are reflective of professionals active on social media and might not be representative of the entire female surgical workforce in the UK. Not all participants filled in the free text boxes and the themes

constructed from the written data are the researchers' interpretations of the written responses.

## Recommendations

The survey posits a current theme of constraints for women working within surgical practice in the UK. The findings should be explored further in National and International Collaborative research for women working in surgery. Interviews and focus groups as methods of data collection would allow participants to speak about their experiences and perspectives in greater detail. A consensus conference, with the guidance and support of regulatory and educational bodies such as ASGBI, could fully explore the barriers faced and work together to produce targeted action plans to address the barriers described.

### Authors' contributions:

Maria Irene Bellini designed the study, wrote the article, searched the literature and interpreted the data; Catherine Hayes and Yitka Graham performed the analysis, wrote the article and interpreted the data; Roxanna Zakeri wrote the article and interpreted the data; Rowan Parks and Vassilios Papalois conceptualized the study, wrote the article, interpreted the data and are the senior authors and executive of the ASGBI.

Conflict of interest: none

Funding source: This work was supported by the Association of Surgeons of Great Britain and Ireland (ASGBI)

## References

1. Royal College of Surgeons of England. Statistics. <http://surgicalcareers.rcseng.ac.uk/wins/statistics>
2. IET. the Institution of Engineering and Technology. Statistics. <https://www.theiet.org/index.cfm>.
3. Lavy V SE. On The Origins of Gender Human Capital Gaps: Short and Long Term Consequences of Teachers' Stereotypical Biases. BER Program(s):Children, Economics of Education, Labor Studies. 2015.
4. Hampton T, Greenhalgh R, Ryan D, Das-Purkayastha P. Female surgical trainee attrition. The Bulletin of the Royal College of Surgeons of England. 2016;98(3):134-7.

- 1
- 2
- 3 5. Villwock JA, Sobin LB, Koester LA, Harris TM. Impostor syndrome and burnout among
- 4 American medical students: a pilot study. *International journal of medical education*. 2016;7:364-9.
- 5 6. Khalil R, Moustafa AA, Moftah MZ, Karim AA. How Knowledge of Ancient Egyptian Women
- 6 Can Influence Today's Gender Role: Does History Matter in Gender Psychology? *Frontiers in*
- 7 *psychology*. 2016;7:2053.
- 8 7. Crawford E. *Women And The First World War: The Work Of Women Doctors*. Ancestors.
- 9 2006.
- 10 8. Michel R. Subjective personal introspection in action-oriented research. *Qualitative Research*
- 11 *in Organizations and Management: An International Journal*. 2011;6(1):6-25.
- 12 9. Page DW. Are surgeons capable of introspection? *The Surgical clinics of North America*.
- 13 2011;91(2):293-304, vii.
- 14 10. Association of Surgeons of Great Britain and Ireland (ASGBI) Women in Surgery facebook
- 15 group <https://www.facebook.com/groups/1607275052681036/>.
- 16 11. Braun V, Clarke V. Using thematic analysis in psychology. *Qualitative Research in Psychology*.
- 17 2006;2(2):77-101.
- 18 12. Yeo HL, Abelson JS, Symer MM, Mao J, Michelassi F, Bell R, et al. Association of Time to
- 19 Attrition in Surgical Residency With Individual Resident and Programmatic Factors. *JAMA surgery*.
- 20 2018.
- 21 13. McNally S. Surgical Training: Still Highly Competitive But Still Very Male. *The Bulletin of the*
- 22 *Royal College of Surgeons of England*. 2012;94(2):53-5.
- 23 14. Parsons BA, Blencowe NS, Hollowood AD, Grant JR. Surgical Training: The Impact of Changes
- 24 in Curriculum and Experience. *Journal of surgical education*.68(1):44-51.
- 25 15. Itum DS, Oltmann SC, Choti MA, Piper HG. Access to paid parental leave for academic
- 26 surgeons. *The Journal of surgical research*. 2018.
- 27 16. Salles A, Milam L, Cohen G, Mueller C. The relationship between perceived gender judgment
- 28 and well-being among surgical residents. *American journal of surgery*. 2018;215(2):233-7.
- 29 17. Dzau VJ, Kirch DG, Nasca TJ. To Care Is Human - Collectively Confronting the Clinician-
- 30 Burnout Crisis. *The New England journal of medicine*. 2018;378(4):312-4.
- 31 18. Equality Challenge Unit. About ECU's Athena SWAN Charter.
- 32 <http://www.ecu.ac.uk/equality-charters/athena-swan/about-athena-swan>.
- 33 19. A P. *Social Media Usage 2008-2015*. 2015.
- 34 20. Bellini MI ML. You cannot be what you cannot see. The journey through surgical training
- 35 from a female perspective. *Journal of the Associations of surgeons of Great Britain and Ireland*.
- 36 2017;50:97-9.
- 37 21. Bellini MI ML. Women in Surgery ASGBI facebook group: an update. *Journal of the*
- 38 *Associations of surgeons of Great Britain and Ireland*. 2017;51:99-101.
- 39 22. Wilkes M, Feldman MD. Mentoring clinical trainees: a need for high touch. *Lancet (London,*
- 40 *England)*. 2017;389(10065):135-7.
- 41 23. Koven S. Letter to a Young Female Physician. *The New England journal of medicine*.
- 42 2017;376(20):1907-9.
- 43 24. Wallis CJ, Ravi B, Coburn N, Nam RK, Detsky AS, Satkunasivam R. Comparison of
- 44 postoperative outcomes among patients treated by male and female surgeons: a population based
- 45 matched cohort study. *BMJ (Clinical research ed)*. 2017;359:j4366.
- 46 25. Tsugawa Y, Jena AB, Figueroa JF, Orav EJ, Blumenthal DM, Jha AK. Comparison of Hospital
- 47 Mortality and Readmission Rates for Medicare Patients Treated by Male vs Female Physicians. *JAMA*
- 48 *internal medicine*. 2017;177(2):206-13.
- 49 26. Philip NC, Matt LH. Working for the Woman? Female Managers and the Gender Wage Gap. *American Sociological Review*. 2007;72(5):681-704.
- 50 27. P Ingram TS. Institutional and Resource Dependence Determinants of Responsiveness to
- 51 Work-Family Issues. *The Academy of Management Journal*. 1995;38(5):1466-82.
- 52 28. V Hunt DL, S Prince. *Why Diversity Matters*. McKinsey & Company. 2015.
- 53
- 54
- 55
- 56
- 57
- 58
- 59
- 60

1  
2  
3  
4  
5  
6  
7  
8  
9  
10  
11  
12  
13  
14  
15  
16  
17  
18  
19  
20  
21  
22  
23  
24  
25  
26  
27  
28  
29  
30  
31  
32  
33  
34  
35  
36  
37  
38  
39  
40  
41  
42  
43  
44  
45  
46  
47  
48  
49  
50  
51  
52  
53  
54  
55  
56  
57  
58  
59  
60

29. Meyerson D TD. Tempered radicals as institutional change agents: the case of advancing gender equity at the University of Michigan. *Harvard Journal of Law & Gender*. 2007;30.  
30. Raymond J. Sexist attitudes: Most of us are biased. *Nature*. 2013;495(7439):33-4.

For peer review only

# BMJ Open

## **A woman's place is in theatre: women's perceptions and experiences of working in surgery from the Association of Surgeons of Great Britain and Ireland Women in Surgery working group.**

|                                 |                                                                                                                                                                                                                                                                                                                                                                                                                                                                                                                                                                                                                                                                                                                                                                                                                                      |
|---------------------------------|--------------------------------------------------------------------------------------------------------------------------------------------------------------------------------------------------------------------------------------------------------------------------------------------------------------------------------------------------------------------------------------------------------------------------------------------------------------------------------------------------------------------------------------------------------------------------------------------------------------------------------------------------------------------------------------------------------------------------------------------------------------------------------------------------------------------------------------|
| Journal:                        | <i>BMJ Open</i>                                                                                                                                                                                                                                                                                                                                                                                                                                                                                                                                                                                                                                                                                                                                                                                                                      |
| Manuscript ID                   | bmjopen-2018-024349.R1                                                                                                                                                                                                                                                                                                                                                                                                                                                                                                                                                                                                                                                                                                                                                                                                               |
| Article Type:                   | Research                                                                                                                                                                                                                                                                                                                                                                                                                                                                                                                                                                                                                                                                                                                                                                                                                             |
| Date Submitted by the Author:   | 09-Oct-2018                                                                                                                                                                                                                                                                                                                                                                                                                                                                                                                                                                                                                                                                                                                                                                                                                          |
| Complete List of Authors:       | Bellini, Maria Irene; Imperial College Healthcare NHS Trust, Renal Transplant Directorate<br>Graham, Yitka; University of Sunderland Department of Pharmacy Health and Well-being, Science Complex; Sunderland Royal Hospital, Directorate of General Surgery, Bariatric Surgical Unit<br>Hayes, Catherine; University of Sunderland, Faculty of Health Sciences and Wellbeing<br>Zakeri, Roxanna; University College London Hospitals NHS Foundation Trust, General Surgery<br>Parks, Rowan; Royal Infirmary of Edinburgh, Directorate of General Surgery, Hepatobiliary-Pancreatic Surgical Services ; University of Edinburgh Division of Health Sciences, Clinical Surgery<br>Papalois, Vassilios; Imperial College Healthcare NHS Trust, Renal Transplant Directorate; Imperial College London Department of Surgery and Cancer |
| <b>Primary Subject Heading</b>: | Surgery                                                                                                                                                                                                                                                                                                                                                                                                                                                                                                                                                                                                                                                                                                                                                                                                                              |
| Secondary Subject Heading:      | Health policy                                                                                                                                                                                                                                                                                                                                                                                                                                                                                                                                                                                                                                                                                                                                                                                                                        |
| Keywords:                       | SURGERY, gender equity, surgical career, STEM                                                                                                                                                                                                                                                                                                                                                                                                                                                                                                                                                                                                                                                                                                                                                                                        |
|                                 |                                                                                                                                                                                                                                                                                                                                                                                                                                                                                                                                                                                                                                                                                                                                                                                                                                      |

SCHOLARONE™  
Manuscripts



**Title:** A woman's place is in theatre: women's perceptions and experiences of working in surgery from the Association of Surgeons of Great Britain and Ireland Women in Surgery working group.

**Authors:**

Maria Irene Bellini<sup>1</sup> PhD, FEBS, Post CCT Transplant Fellow  
mariairene.bellini@nhs.net

Yitka Graham<sup>2,3</sup>, PhD, Senior Lecturer in Health Services and NHS Engagement and Researcher in Bariatric Surgery Yitka.Graham@sunderland.ac.uk

Catherine Hayes<sup>2</sup>, PhD, MSc, Reader in Health Professions Pedagogic Practice and Visiting Professor in Higher Education at Universities of Cumbria and Liverpool Hope

Catherine.hayes@sunderland.ac.uk

Roxanna Zakeri<sup>4</sup>, MBBS, MA (Hons) MRCS, General Surgery Specialty Registrar  
roxanna.zakeri@nhs.net

Rowan Parks<sup>5,6</sup>, MD, MB BCh BAO, FRCSI, FRCSEd, Professor of Surgical Sciences Royal Infirmary of Edinburgh r.w.parks@ed.ac.uk

Vassilios Papalois<sup>1,7</sup> KJSJ, MD, PhD, FICS, FRCS, FEBS, Professor of Transplantation vassilios.papalois@nhs.net

1. Renal and Transplant Directorate, Hammersmith Hospital, Imperial College Healthcare NHS Trust, London UK
2. Faculty of Health Sciences and Wellbeing, University of Sunderland, Sciences Complex, Chester Road Sunderland, UK
3. Directorate of General Surgery, Bariatric Surgical Unit, Sunderland Royal Hospital, Sunderland, Kayll Road, Sunderland, UK
4. Department of General Surgery, University College London Hospital NHS Foundation Trust, London, UK
5. Directorate of General Surgery, Hepatobiliary-Pancreatic Surgical Services Royal Infirmary of Edinburgh
6. Department of Clinical Surgery, University of Edinburgh, Edinburgh UK
7. Department of Surgery and Cancer, Imperial College London, London UK

**Corresponding author:**

Maria Irene Bellini, Renal and Transplant Directorate, Hammersmith Hospital, Imperial College Healthcare NHS Trust, London, UK. Email: [Mariairene.bellini@nhs.net](mailto:Mariairene.bellini@nhs.net), Telephone: 0203 3135165

**Abbreviations**

ASGBI: Associations of Surgeons of Great Britain and Ireland

CCT: Certificates of Completion of Training

CV: Curriculum Vitae

LTFT: Less Than Full Time

STEM: Science, Technology, Engineering and Mathematics

WHO: World Health Organization

Keywords: surgery, gender equity, surgical career, STEM

**Abstract Word count 300**

**Objective:** Surgery remains an inherently male-dominated profession. The aim of this study was to survey women working within the discipline, to understand their current perceptions, providing insight into their practical day-to-day lives, supporting an action-oriented change.

**Design and Setting:** The link to a confidential, on-line survey was distributed through the Association of Surgery of Great Britain and Ireland (ASGBI) social media platforms on Facebook and Twitter over a two-week period in October 2017.

**Participants:** Women working in surgical specialties and actively responding to the link shared through the ASGBI social media platforms. No patients were involved in the study.

1  
2  
3 **Primary and Secondary Outcome measures:** Data were analysed through a mixed  
4 methods approach. The quantitative data was analysed through descriptive  
5 statistics and qualitative analysis was undertaken using a constant comparative  
6 analysis of the participants' comments, to identify salient patterns (themes).  
7  
8  
9

10  
11  
12  
13 **Results:** A total of 81 female participants replied (42% response rate based on the  
14 Facebook group members), with 88% (n=71) perceiving surgery as a male-  
15 dominated field. Over half had experienced discrimination (59%, n=47), whilst 22%  
16 (n=18) perceived a 'glass ceiling' in surgical training. Orthopaedics was reported as  
17 the most sexist surgical specialty by 53% (n=43). Accounts of gendered language in  
18 the workplace were reported by 59% (n=47), with 32% (n=25) of surveys participants  
19 having used it. Overall, a lack of formal mentorship, inflexibility towards part-time  
20 careers, gender stereotypes and poor work-life balance were the main perceived  
21 barriers for women in surgical careers.  
22  
23  
24  
25  
26  
27  
28  
29  
30  
31  
32  
33  
34

35 **Conclusion:** These findings highlight the implicit nature of the perceived  
36 discrimination that women report in their surgical careers. The ASGBI acknowledges  
37 these perceptual issues and relative implications as the first of many steps to create  
38 an action-oriented change by allowing all staff, regardless of gender, to reflect on  
39 their own behaviour, perceptions and the culture in which they work.  
40  
41  
42  
43  
44  
45  
46

47 **Trial registration:** not applicable  
48  
49  
50

51 **Strengths and limitations of the study:**  
52  
53  
54  
55  
56  
57  
58  
59  
60

- This study adopted a multiple methods approach with the qualitative elements enriching the quantitative data on the topics addressed.
- The nature of the survey allowed critical introspection with a useful insight to create the action-oriented change.
- The representativeness and transferability of the data are hindered by the probability that women who had encountered discrimination were more likely to respond to this survey.
- As an online survey, it was not possible to probe to gain a deeper understanding of the comments.

## Article Word count 4291

### Introduction

Despite annual intakes of medical school cohorts evidencing a 55% female contingent, only 28% of these women eventually pursue a career in surgery via higher surgical training in the UK (1). Beyond these baseline figures, a qualitative analysis of the factors deterring women from pursuing surgery as a career in the western countries is needed to understand more in depth the nature of these hidden barriers (2).

In reality, several extraneous variables rooted in socio-cultural backgrounds, such as toy-makers sometimes blatantly but more often inadvertently, discourage girls from studying science, technology, engineering and mathematics (STEM) (3), as do some of their teachers (4, 5). It is evident that some girls lack role models in these fields and grow up with the unfounded pre-supposition they would not do well in those, considered male and technical professions (6). This ultimately influences their

1  
2  
3 intrinsic motivation and their resultant capacity to succeed in fields like surgery, due  
4  
5 to the perception that these careers require self-selected individuals who are driven,  
6  
7 competitive, and able to endure years of intense schooling and high expectations (7).  
8  
9

10 Although there is acknowledgement of the longstanding historical contribution to  
11  
12 surgical practice from women (8, 9) the manner in which women feel perceived by  
13  
14 their male counterparts is under-evidenced and little reported. The key aim of this  
15  
16 study is then to capture the perceived barriers in the experiences of women working  
17  
18 within the field of surgery and to use them as a source of reflection for surgical staff  
19  
20 of either gender, for policy makers and for professional bodies such as the  
21  
22 Association of Surgeons of Great Britain and Ireland (ASGBI). Acknowledging these  
23  
24 issues is the first of many steps to addressing their implication and to help moving  
25  
26 beyond tokenism in the co-construction of relevant, impactful and evidence-based  
27  
28 action(10).  
29  
30  
31  
32  
33

### 34 **Methods**

35 The link to a voluntary, confidential, on-line survey was distributed through the  
36  
37 ASGBI Women in Surgery social media platforms of Facebook (191 members) and  
38  
39 shared via Twitter for a two week period in October 2017. Weekly reminders were  
40  
41 posted. The Facebook site (11) is a closed group comprised of healthcare  
42  
43 professionals working in the field of surgery. It is mainly composed by women (90%),  
44  
45 aged between 25-34 years (39%) and 35-44 years (30%). The main origin country is  
46  
47 the UK (70%), with also contribution from India, Pakistan, USA, Europe and Africa.  
48  
49  
50

51 The questions were designed to understand whether barriers exist to deter women  
52  
53 from pursuing surgery as a career, and if so, what these barriers are and what  
54  
55 interventions would be suggested in order to reduce them. Respondents were  
56  
57  
58  
59

1  
2  
3 encouraged to provide their personal opinions throughout the free text boxes after  
4 each question. As the aim of the research was to obtain as many responses as  
5 possible, whilst understanding the participants' experiences of being a female  
6 working in surgery, a mixed methods approach was used. The quantitative data was  
7 analysed through descriptive statistics, and to provide context to this data and more  
8 fully explore the participants' responses, a qualitative approach was taken using  
9 constant comparative analysis of the participants' comments, to identify patterns  
10 (themes) within the responses. This was guided by the principles of thematic  
11 analysis (12), using a six step process of data familiarisation, generating initial  
12 codes, searching for themes, reviewing themes, defining and naming themes and  
13 producing the report.  
14  
15  
16  
17  
18  
19  
20  
21  
22  
23  
24  
25

#### 26 27 *Patient and Public Involvement.*

28  
29 No patients were involved in the study. Given the sensitivity of the topic, the closed  
30 access to the social media platforms, and the wish to ensure honest, open  
31 responses and anonymity, no demographic information was collected.  
32  
33  
34  
35  
36  
37

#### 38 **Results**

39 A total of 81 participants completed the survey, an estimated response rate of 42%  
40 based on the Facebook group membership. It was not possible to determine how the  
41 Twitter platform influenced response rate.  
42  
43  
44  
45  
46

#### 47 ***Quantitative Analysis***

48  
49 The 88% (n=71) felt that surgery remains a male-dominated field, with 59% (n=47)  
50 reporting or witnessing discrimination against females in the workplace. The hidden  
51 barriers for women reported by 34% (n=28) were that the profession was not  
52  
53  
54  
55  
56  
57  
58  
59  
60

conducive to motherhood and family life, with 16% (n=13) citing childcare issues. There was a perception that the surgical profession and culture was male-oriented, conceptualised as an 'old boys club' (16%, n=33) and possessing a masculine attitude and negative bias (13%, n=9). The framework for a career in surgery was reported as lacking flexibility and part-time careers (12%, n=10), with 10% (n=8) citing unsocial hours and working patterns (see Table I).

**Table I Participant-perceived barriers to a career in surgery**

| Barrier                                                                   | Response   |
|---------------------------------------------------------------------------|------------|
| Not a profession conducive with motherhood, family and children           | 34% (n=28) |
| Childcare issues                                                          | 16%(n=13)  |
| 'Old Boys' Club/network                                                   | 16% (n=13) |
| Male attitudes/bias                                                       | 13%(n=11)  |
| Culture of surgery as a masculine field                                   | 12% (n=10) |
| Unconscious bias                                                          | 12%(n=10)  |
| Lack of flexible/part-time training                                       | 12%(n=10)  |
| Unsocial hours/working patterns/rotas                                     | 10%(n=8)   |
| Perceptions by Nurses and Patients that women are not able to be surgeons | 7%(n=6)    |
| Maternity leave/career break                                              | 6%(n=5)    |
| Women are excluded from 'male-only' social events                         | 6% (n=5)   |
| Women less confident in their abilities                                   | 5%(n=4)    |
| Lack of female role models                                                | 5%(n=4)    |
| Men have more variety in surgical career choices                          | 5%(n=4)    |
| Male surgeons behaving inappropriately                                    | 4%(n=3)    |
| Patients prefer male surgeons                                             | 4%(n=3)    |
| Image of female surgeons as being on par with a nurse                     | 2%(n=2)    |
| Perceptions that women will want a less onerous career                    | 2% (n=2)   |
| Social barriers                                                           | 2%(n=2)    |
| Barriers are explicit, not hidden                                         | 2%(n=2)    |
| Lack of flexibility                                                       | 2%(n=2)    |
| Women need to be seen as ruthless in order to succeed                     | 2%(n=2)    |
| Women need to pull their weight like a man                                | 2%(n=2)    |
| Hard for women to establish a private practice                            | n=1        |
| Personal expectations                                                     | n=1        |
| Historical/traditional expectations of women                              | n=1        |
| No barriers                                                               | 4% (n=3)   |
| Respondent skipped question                                               | 7%(n=6)    |

The concept of a 'glass ceiling' for women within the surgical profession was raised, with 44% (n=36) feeling this did not exist. All 81 participants answered this question, with 21% (n=17) feeling there was a tangible glass ceiling. The remaining 35% (n=28) chose not to comment.

Respondents were also asked if a glass ceiling existed at any particular levels during surgical training, with 9% (n=7) stating that this was evident at all levels; 6% (n=5) referred women underrepresentation at consultant role with different treatment compared to males.

Given the lack of women in surgical careers, participants were asked to comment on why women may be attracted to other clinical specialties. The most frequent responses (26%, n= 21) were quality of life/work-life balance and less unsocial hours (15%, n= 12) (see Table II).

**Table II Benefits of working in non-surgical specialties for women**

|                                                                 |            |
|-----------------------------------------------------------------|------------|
| Quality of life/flexibility/work and life balance               | 26% (n=21) |
| More accepting of part-time/less than full time training (LTFT) | 17% (n=14) |
| Less unsocial hours                                             | 15%(n=12)  |
| More role models/mentoring                                      | 15% (n=12) |
| Accepting of childcare and family commitments                   | 10% (n=8)  |
| Less macho/male attitudes                                       | 7% (n=6)   |
| Less on call                                                    | 7% (n=6)   |
| Less intimidating reputation/less competitive                   | 6% (n=5)   |
| Other                                                           | 21% (n=17) |
| Not sure/don't know                                             | 16% (n=13) |
| Respondent skipped question                                     | 7% (n=6)   |

When asked what could be done to attract more women to the surgical professions, nearly half (42%, n=34) cited improved quality of life, and flexibility in part-time pathways with career and training options (see Table III).



**Table III What could surgery do to attract more women to the profession?**

|                                                              |            |
|--------------------------------------------------------------|------------|
| Flexible training and career options (e.g. part-time, LTFT)  | 42% (n=34) |
| Project a less masculine image/address this                  | 25% (n=20) |
| Improve the work/life balance                                | 18% (n=15) |
| More female mentors/role models                              | 18% (n=15) |
| More team/collaborative approaches                           | 7% (n=6)   |
| Financial support of trainees                                | 6% (n=5)   |
| Remove the perception of the need for PhDs/to be an academic | 3 % (n=3)  |
| Sessional work                                               | 2% (n=2)   |
| More positions in larger cities                              | 2% (n=2)   |
| Less overbooking                                             | 1% (n=2)   |
| More surgical training for medical students                  | 1% (n=1)   |
| Educate surgeons in unconscious bias                         | 1% (n=1)   |
| Don't know/Not sure                                          | 5% (n=5)   |
| Nothing                                                      | 3% (n=3)   |
| Respondent skipped question                                  | 6% (n=5)   |

Although there is existing support for women in surgery, such as Less Than Full Time (LTFT) training and maternity leave, the dearth of women in surgical professions may demonstrate that there is a need for additional support mechanisms. Over 30% of respondents felt that LTFT training was perceived negatively, and this needed to be addressed. There was also a reported need to reduce stigma associated with women taking career breaks (22%, n=18) and to increase understanding of the impact of family on day-to-day activities (18%, n=15) in surgical practice (see Table IV).

**Table IV What other support (aside from LTFT and maternity leave) is needed for women in surgery?**

|                                                                          |            |
|--------------------------------------------------------------------------|------------|
| Change the negative perceptions of LTFT                                  | 32% (n=26) |
| Reduce the perceived stigma associated with women who take career breaks | 22% (n=18) |
| Increase understanding of the perceived impact of family on day to day   | 18%        |

|                                                                                                         |                |
|---------------------------------------------------------------------------------------------------------|----------------|
| work activities and support this                                                                        | (n=15)         |
| Encourage men to take LTFT                                                                              | 15%<br>(n=12)  |
| Not sure                                                                                                | 13%,<br>(n=11) |
| Career break                                                                                            | 13%,<br>(n=11) |
| On site childcare                                                                                       | 7%, (n=6)      |
| More awareness and promotion of rules, regulations and support of gender equality and support for women | 6% (n=5)       |
| Nothing needed                                                                                          | 6% (n=5)       |
| Modular training                                                                                        | 6% (n=5)       |
| Other                                                                                                   | 26%<br>(n=21)  |

To further explore the perceptions of a male-dominated surgical culture, participants were asked to list the specialties in which this dominated. More than half (53%, n=43) felt that Trauma and Orthopaedics was a sexist specialty, followed by Cardiothoracic (16%, n= 13) and General Surgery (15%, n=12), with 15% reporting no surgical specialty as being more sexist than another (see Table V).

**Table V Participant reported sexist surgical specialties**

| <b>Surgical specialty</b> | <b>Reponses</b> |
|---------------------------|-----------------|
| Orthopaedics/Trauma       | 53% (n=43)      |
| Cardiothoracic            | 16% (n=13)      |
| General surgery           | 15% (n=12)      |
| Not sure/don't know       | 15% (n=12)      |
| Urology                   | 5% (n=4)        |
| None                      | 4% (n=3)        |
| Vascular                  | 4% (n=3)        |
| Neurosurgery              | 4% (n=3)        |
| Hepatobiliary             | n=1             |
| Plastics                  | n=1             |
| All                       | n=1             |
| Leading question          | n=1             |
| Skipped question          | 11% (n=9)       |

Over half of respondents (58%, n=47) felt that gendered language exists within surgery. A quarter of the respondents confessed to having used gendered language themselves, but over half (52%, n=41) had not used it, with gendered language not affecting career choices for 87% (n=70%). The most common method of challenging gendered language was to speak out/correct and state inappropriate language (30%, n=24), but 18% (n=15) had not encountered any incidences (see Table VI).

**Table VI Challenging sexist language in the workplace**

| Action                                                | Response   |
|-------------------------------------------------------|------------|
| Speaking up/correcting/stating inappropriate language | 30% (n=24) |
| Not experienced sexist language                       | 18% (n=15) |
| Humour                                                | 9% (n=7)   |
| Find it difficult                                     | 7% (n=6)   |
| Non-confrontational approach/social media             | 2% (n=2)   |
| Not able to interpret response                        | 10%(n=8)   |
| Ignore/refuse to respond                              | 7%(n=6)    |

When asked what advice they would give to others when encountering gendered language, the most common recommendation was to confront or speak to the person (51%, n=41), with 17% (n=14) advising correction of the language used (see Table VII).

**Table VII Advice to colleagues on dealing with sexist language in workplace environments**

| Advice                                                                                                                                                | Response   |
|-------------------------------------------------------------------------------------------------------------------------------------------------------|------------|
| Confront/speak to person involved                                                                                                                     | 51% (n=41) |
| Correct the language used                                                                                                                             | 17%(n=14)  |
| Respondent did not answer                                                                                                                             | 12% (n=10) |
| Deflect using humour                                                                                                                                  | 11% (n=9)  |
| Do not accept/remain silent                                                                                                                           | 10%(n=8)   |
| Ignore                                                                                                                                                | 9% (n=7)   |
| Be aware that people may not be aware they are using sexist language/don't make an issue out of it (unless 'over the line')/don't be overly sensitive | 7% (n=6)   |
| Seek support from others/support others                                                                                                               | 7% (n=6)   |
| Don't know/no advice                                                                                                                                  | 4% (n=3)   |
| File complaint                                                                                                                                        | 3% (n=2)   |

|                   |     |
|-------------------|-----|
| Demand apology    | n=1 |
| Treat as bullying | n=1 |

### ***Thematic Analysis***

There was an overarching theme of participants feeling constrained within the present surgical environment, which appears to be better equipped to support males, with sociocultural norms embedded in masculine discourses. The participants appeared to make efforts to fit into the environment, adapting a variety of stances to do this. The constraints were conceptualised as conflicting personal and career decisions, under-representation, a relative rigidity in surgical career structures, and the process of discrimination, both active and nuanced (self and others), that exists in current surgical practice. These themes are supported by in-vivo quotes from the data:

#### ***Conflict between personal and career decisions***

*'Trainees have families and other responsibilities to manage as well as surgical training'*

*'At registrar level, many women switch to GP training for family reasons'*

*'Maybe there is a glass ceiling, as the training scheme is long. When you want to have a family you are at senior level for jobs. It is harder to stay focused on career and your curriculum vitae (CV). This affects the quality of your CV at interview for consultancy. Somehow, it's easier for wives to follow their surgeon husbands rather than for husbands to follow surgeon wives'*

*'I am horrified by the stories of women in the first trimester of pregnancy with morning sickness vomiting several times between procedures during a list, and women in the third trimester doing nights, etc., especially when they want to switch to a less physically intense session'*

#### ***Under-representation***

1  
2  
3 *'Up until recently, there were no women in my sub-specialty'*  
4

5 *'Now that I am a consultant, I feel massively in the minority'*  
6  
7

### 8 9 **Rigidity in surgical career structures**

10  
11  
12 *'Reduce the hierarchal nature of surgical training; this would improve safety*  
13 *and morale for all'*  
14

15 *'There needs to be a real understanding that having a small child really*  
16 *hinders the ability to do things like extra work that needs to be completed out*  
17 *of hours. If there was a way to come back into training but have a pause on in*  
18 *counting towards your time up then there would be less financial and*  
19 *timescale stress'*  
20

21 *'Flexible training and to stop having such rigid pathways to CCT (Certificates*  
22 *of Completion of Training), different paths are ok and valid. We also need true*  
23 *competency based training – some people will complete faster than 5/6 years,*  
24 *others might need longer. Be more open to time out.'*  
25

26 *'There's an implicit assumption that surgeons will be able to have their*  
27 *families trail around the country after them for jobs and fellowships.*  
28 *Realistically this is less possible for women with professional partners and*  
29 *small children. Women are presumed to deskill during maternity leave and*  
30 *discouraged from working part-time.'*  
31

### 32 33 34 **Discrimination: self**

35  
36 *'Generally, women are less confident in their abilities, whereas men are more*  
37 *confident...often holds females back'*  
38

39 *'Some women try and take advantage way over expected norms and use it to*  
40 *bargain for favours which make things worse'*  
41  
42

### 43 44 45 **Discrimination: others**

46  
47  
48 *'People see a glass ceiling, actually you can get in, but you are treated*  
49 *differently, so really a glass cliff'*  
50

51 *'You're an unlikely looking orthopod'*  
52

53 *'I find the surprise and confusion and refusal to believe I'm an orthopod e.g.*  
54 *'you're too nice to be an orthopod' and 'that's not something to be proud of'*  
55 *very frustrating'*  
56  
57

1  
2  
3 *'I recently presented a paper at a plenary session at a UK surgical meeting. I*  
4 *was the only female presenter. I got equal marks as the top male candidate*  
5 *(announced at the podium by the head of the society) but the prize was given*  
6 *to the male and the prize was a tie'*  
7

8 *'I have done the World Health Organization checklist and then had the*  
9 *comment 'we need to wait for the surgeon' despite having introduced myself*  
10 *as the surgeon'*  
11

12 *'I got told by another surgeon that he left vascular surgery for plastics*  
13 *because there were 'too many women surgeons and they caused too much*  
14 *drama'.'*  
15

16  
17  
18  
19 There were reported accounts of patients using gendered language with implicit  
20 assumptions that female surgeons were not acceptable, or that being female was not  
21 associated with being a surgeon:  
22  
23

24  
25  
26 *'Patients don't think women can be doctors, let alone surgeons'*  
27

28  
29  
30 *'Significantly more patients call me nurse or lady doctor than any of my*  
31 *colleagues'*  
32

33  
34  
35 *'Patients are often shocked that I will be doing their operation, and I have led*  
36 *ward rounds where the patients have talked to my tall male F1 and not me'*  
37

38 *'Patients are extraordinarily sexist e.g. patients have walked into a consulting*  
39 *room and said to me 'I thought I would be seeing a doctor at least' before I*  
40 *had time to introduce myself. I am 34 and been a doctor for 10 years'*  
41

42  
43 Perceived implicit discrimination was reported, but could not be proven:  
44  
45

46 *'I had difficulty trying to get a consultant job. Although I was already working*  
47 *as a locum consultant, I lost out many times to younger men who were all*  
48 *registrars. Various reasons were cited, but I did begin to wonder if my face*  
49 *didn't fit. Until a couple of years ago, there were no women in my particular*  
50 *subspecialty'*  
51

52 *'Improve the stigma that is sometimes attached to women who choose to take*  
53 *time out of their careers for children. Many women I've spoken to say they*  
54 *aren't viewed as competent as their full time colleagues'*  
55

56 *'We lose out on consultant posts to younger males'*  
57  
58  
59  
60

1  
2  
3 In the physical workplace, there was an account of discrimination:  
4

5 *'I am the only female Consultant General Surgeon in my Trust. I'm not*  
6 *allowed in the consultant changing room. There is one consultant changing*  
7 *room and it is for men only'*  
8

9 Accounts of discrimination were supported by other healthcare staff:  
10

11  
12 *'Theatre staff have commented that male surgeons get more opportunities in*  
13 *theatre than female'*  
14

15 There were also reports of female surgeons being discriminated against by other  
16 non-surgical staff:  
17

18 *'The secretaries in my Trust do not do as much for the female consultants as*  
19 *they are perceived as having taken a 'man's job'.'*  
20  
21

## 22 **Discussion**

23  
24 This survey, conducted through the ASGBI social media platforms, illuminates the  
25  
26 lived realities of female surgeons in the UK today. Gender bias and discrimination  
27  
28 were reported by 59% of the participants irrespective of level of training and  
29  
30 experience, suggesting an ancient culture pervading our society since the 1800s, at  
31  
32 the time of the first female surgeon in the UK, Elizabeth Garrett (13, 14).  
33  
34

35  
36 The greatest perceived barrier to women wanting to pursue and persist with a career  
37  
38 in surgery was incongruity with motherhood and childcare commitments (50%).  
39  
40 Literature reports a significant level of attrition for women in surgical training (15),  
41  
42 traditionally seen as one of the most competitive and time-consuming specialties  
43  
44 (16) with the perception that spending less time in surgical training would  
45  
46 compromise competency achievement (17). Furthermore, there is discrepancy on  
47  
48 parental leave policies across hospital trusts and specialties, despite widespread  
49  
50 recognition that better support for parents engenders marked benefits for the health  
51  
52 and wellbeing of doctors, their children and ultimately healthcare provision (18). The  
53  
54 general perception is that family-friendliness may be hard to reconcile with the  
55  
56  
57  
58  
59  
60



1  
2  
3 working requirements of the surgical specialty, often involving patient treatment of  
4 unknown length or at unsocial times of day or night (19). There is a challenge to  
5 manage work in these areas and to improve family-friendliness without  
6 compromising patient care. This lack of support is potentially leading to burnout,  
7 since we know that this is ultimately driven by external factors such as excessive  
8 working hours, workload and conflicts with family commitments (13, 14). Thus, for  
9 some women, the only perceived option to preserve their own mental health is  
10 represented by withdrawing from surgical training.

11  
12  
13  
14  
15  
16  
17  
18  
19  
20  
21 How do we create the change needed? Encouraging and tangible signs of an  
22 already emergent cultural change, like day-care facilities and childcare options, are  
23 reflected in the wider societal acknowledgement of women in surgery. One example  
24 is the New Year's Honours List, where the Royal College of Surgeons of England  
25 past president, and first female president, Clare Marx, received a damehood in  
26 acknowledgement of her contribution to surgical practice. In addition to this, Jackie  
27 Taylor has been chosen as president-elect of the Royal College of Physicians and  
28 Surgeons of Glasgow for the first time in its 418-year history, where, for the first time,  
29 there is also a female surgical vice-president, Alison Lannigan. Whilst these women  
30 are atypical and not necessarily representative of all women in surgery, they act as  
31 positive role models for women in the context of career progression. We need  
32 strategic encouragement and education about the realities of leadership roles in  
33 STEM, along with instigation of evidence-based and effective schemes for gender  
34 equality in the workplace, such as the ATHENA SWAN for academic careers (20).

35  
36  
37  
38  
39  
40  
41  
42  
43  
44  
45  
46  
47  
48  
49  
50  
51  
52  
53  
54  
55  
56  
57  
58  
59  
60  
61  
62  
63  
64  
65  
66  
67  
68  
69  
70  
71  
72  
73  
74  
75  
76  
77  
78  
79  
80  
81  
82  
83  
84  
85  
86  
87  
88  
89  
90  
91  
92  
93  
94  
95  
96  
97  
98  
99  
100  
101  
102  
103  
104  
105  
106  
107  
108  
109  
110  
111  
112  
113  
114  
115  
116  
117  
118  
119  
120  
121  
122  
123  
124  
125  
126  
127  
128  
129  
130  
131  
132  
133  
134  
135  
136  
137  
138  
139  
140  
141  
142  
143  
144  
145  
146  
147  
148  
149  
150  
151  
152  
153  
154  
155  
156  
157  
158  
159  
160  
161  
162  
163  
164  
165  
166  
167  
168  
169  
170  
171  
172  
173  
174  
175  
176  
177  
178  
179  
180  
181  
182  
183  
184  
185  
186  
187  
188  
189  
190  
191  
192  
193  
194  
195  
196  
197  
198  
199  
200  
201  
202  
203  
204  
205  
206  
207  
208  
209  
210  
211  
212  
213  
214  
215  
216  
217  
218  
219  
220  
221  
222  
223  
224  
225  
226  
227  
228  
229  
230  
231  
232  
233  
234  
235  
236  
237  
238  
239  
240  
241  
242  
243  
244  
245  
246  
247  
248  
249  
250  
251  
252  
253  
254  
255  
256  
257  
258  
259  
260  
261  
262  
263  
264  
265  
266  
267  
268  
269  
270  
271  
272  
273  
274  
275  
276  
277  
278  
279  
280  
281  
282  
283  
284  
285  
286  
287  
288  
289  
290  
291  
292  
293  
294  
295  
296  
297  
298  
299  
300  
301  
302  
303  
304  
305  
306  
307  
308  
309  
310  
311  
312  
313  
314  
315  
316  
317  
318  
319  
320  
321  
322  
323  
324  
325  
326  
327  
328  
329  
330  
331  
332  
333  
334  
335  
336  
337  
338  
339  
340  
341  
342  
343  
344  
345  
346  
347  
348  
349  
350  
351  
352  
353  
354  
355  
356  
357  
358  
359  
360  
361  
362  
363  
364  
365  
366  
367  
368  
369  
370  
371  
372  
373  
374  
375  
376  
377  
378  
379  
380  
381  
382  
383  
384  
385  
386  
387  
388  
389  
390  
391  
392  
393  
394  
395  
396  
397  
398  
399  
400  
401  
402  
403  
404  
405  
406  
407  
408  
409  
410  
411  
412  
413  
414  
415  
416  
417  
418  
419  
420  
421  
422  
423  
424  
425  
426  
427  
428  
429  
430  
431  
432  
433  
434  
435  
436  
437  
438  
439  
440  
441  
442  
443  
444  
445  
446  
447  
448  
449  
450  
451  
452  
453  
454  
455  
456  
457  
458  
459  
460  
461  
462  
463  
464  
465  
466  
467  
468  
469  
470  
471  
472  
473  
474  
475  
476  
477  
478  
479  
480  
481  
482  
483  
484  
485  
486  
487  
488  
489  
490  
491  
492  
493  
494  
495  
496  
497  
498  
499  
500  
501  
502  
503  
504  
505  
506  
507  
508  
509  
510  
511  
512  
513  
514  
515  
516  
517  
518  
519  
520  
521  
522  
523  
524  
525  
526  
527  
528  
529  
530  
531  
532  
533  
534  
535  
536  
537  
538  
539  
540  
541  
542  
543  
544  
545  
546  
547  
548  
549  
550  
551  
552  
553  
554  
555  
556  
557  
558  
559  
560  
561  
562  
563  
564  
565  
566  
567  
568  
569  
570  
571  
572  
573  
574  
575  
576  
577  
578  
579  
580  
581  
582  
583  
584  
585  
586  
587  
588  
589  
590  
591  
592  
593  
594  
595  
596  
597  
598  
599  
600  
601  
602  
603  
604  
605  
606  
607  
608  
609  
610  
611  
612  
613  
614  
615  
616  
617  
618  
619  
620  
621  
622  
623  
624  
625  
626  
627  
628  
629  
630  
631  
632  
633  
634  
635  
636  
637  
638  
639  
640  
641  
642  
643  
644  
645  
646  
647  
648  
649  
650  
651  
652  
653  
654  
655  
656  
657  
658  
659  
660  
661  
662  
663  
664  
665  
666  
667  
668  
669  
670  
671  
672  
673  
674  
675  
676  
677  
678  
679  
680  
681  
682  
683  
684  
685  
686  
687  
688  
689  
690  
691  
692  
693  
694  
695  
696  
697  
698  
699  
700  
701  
702  
703  
704  
705  
706  
707  
708  
709  
710  
711  
712  
713  
714  
715  
716  
717  
718  
719  
720  
721  
722  
723  
724  
725  
726  
727  
728  
729  
730  
731  
732  
733  
734  
735  
736  
737  
738  
739  
740  
741  
742  
743  
744  
745  
746  
747  
748  
749  
750  
751  
752  
753  
754  
755  
756  
757  
758  
759  
760  
761  
762  
763  
764  
765  
766  
767  
768  
769  
770  
771  
772  
773  
774  
775  
776  
777  
778  
779  
780  
781  
782  
783  
784  
785  
786  
787  
788  
789  
790  
791  
792  
793  
794  
795  
796  
797  
798  
799  
800  
801  
802  
803  
804  
805  
806  
807  
808  
809  
810  
811  
812  
813  
814  
815  
816  
817  
818  
819  
820  
821  
822  
823  
824  
825  
826  
827  
828  
829  
830  
831  
832  
833  
834  
835  
836  
837  
838  
839  
840  
841  
842  
843  
844  
845  
846  
847  
848  
849  
850  
851  
852  
853  
854  
855  
856  
857  
858  
859  
860  
861  
862  
863  
864  
865  
866  
867  
868  
869  
870  
871  
872  
873  
874  
875  
876  
877  
878  
879  
880  
881  
882  
883  
884  
885  
886  
887  
888  
889  
890  
891  
892  
893  
894  
895  
896  
897  
898  
899  
900  
901  
902  
903  
904  
905  
906  
907  
908  
909  
910  
911  
912  
913  
914  
915  
916  
917  
918  
919  
920  
921  
922  
923  
924  
925  
926  
927  
928  
929  
930  
931  
932  
933  
934  
935  
936  
937  
938  
939  
940  
941  
942  
943  
944  
945  
946  
947  
948  
949  
950  
951  
952  
953  
954  
955  
956  
957  
958  
959  
960  
961  
962  
963  
964  
965  
966  
967  
968  
969  
970  
971  
972  
973  
974  
975  
976  
977  
978  
979  
980  
981  
982  
983  
984  
985  
986  
987  
988  
989  
990  
991  
992  
993  
994  
995  
996  
997  
998  
999  
1000

Visibility of role models is key to increasing current female training rates and public  
advocacy campaigns through social media facilitate education and awareness of  
culturally sensitive matters. To this end, the ASGBI launched a Facebook group(11)



1  
2  
3 to bring individuals together for networking and communications about women in  
4 surgery, parenting and work-life balance (11). As primary communication methods,  
5 social media are increasingly integrated into the daily routine of individuals personal  
6 activity and practice, with 68% of women and 62% of men using them (21). We aim  
7 to be what we see or what we deal with in our daily practice (22). The ASGBI  
8 #HowIBecameAWomanInSurgery” campaign was created on this basis to shine light  
9 on the journey through the training pathways of female surgeons. Since much of a  
10 culture is underpinned and shaped by the language used (23), we advocate for a  
11 cultural identification with women becoming surgeons. Sharing the journeys of  
12 successful female surgeons aims to inspire and support other members, allowing  
13 them to see how frequently encountered barriers were overcome from different  
14 perspectives(24). Evidence of the benefits of mentoring to support women as they  
15 progress in their careers is plentiful (25). Interestingly, this survey revealed great  
16 awareness of the benefits of mentoring amongst female surgeons, but a view in 15%  
17 that it currently remains an advantage to be gained primarily in non-surgical  
18 specialties. The lack of female role models in surgical leadership and consultancy  
19 positions contribute to the perpetration of the white male stereotypical gender role,  
20 and those who do not fulfil these characteristics, may believe they cannot make in  
21 this environment (22, 26). To address this structural problem, a more diverse senior  
22 team could prevent discrimination against women in surgery favouring their hiring  
23 and promotion.

24  
25  
26  
27  
28  
29  
30  
31  
32  
33  
34  
35  
36  
37  
38  
39  
40  
41  
42  
43  
44  
45  
46  
47  
48  
49 Finally, personality traits and behaviours adopted by surgeons are often perceived  
50 differently depending on a surgeon’s gender, which can have significant impact on  
51 an individual’s confidence and self-reflection. Respondents to this survey noted  
52 being labelled as ruthless in order to succeed (2%), pressured to ‘pull their weight  
53  
54  
55  
56  
57  
58  
59  
60

1  
2  
3 like a man' (2%) and admitted a lack of confidence in their ability (5%). Women excel  
4  
5 in some areas more typically difficult for their male counterparts, including  
6  
7 communication, collaboration, and patient centeredness (27). Recent analysis of  
8  
9 over 100,000 surgical patients in Canada, found that those who were operated on by  
10  
11 female surgeons were less likely to die one month after their procedure (28). More in  
12  
13 details, the selection of the surgical procedures followed these criteria: inclusion of  
14  
15 all surgical subspecialties with female surgeons and either frequently performed in  
16  
17 Ontario or having an increased likelihood of complications. The patients were  
18  
19 matched on a 1:1 basis, using a hard match comprising procedural fee code,  
20  
21 surgeon volume, surgeon age, hospital identifier, patient age, patient sex and patient  
22  
23 comorbidities. The findings mirrored those of an analogue study, according to which  
24  
25 female internal medicine doctors had slightly lower rates of death within 30 days of  
26  
27 initial hospitalisation (29). Those data need adequate dissemination amongst  
28  
29 healthcare professionals and general population, as in our survey the glass ceiling  
30  
31 for women is also represented by nurses and patients (7%).  
32  
33  
34

35 This study builds on the global commitment for greater female representation and  
36  
37 support in STEM. The greatest challenge currently faced, in the opinion of the  
38  
39 authors, is the realisation and elimination of unconscious bias existing in surgery.  
40  
41 Gender equity is a leadership issue: when more women are in leadership positions,  
42  
43 organisations offer employees more generous policies to support workplace gender  
44  
45 (30, 31) and produce better business results (32).  
46  
47

48 Cultural change requires a nucleus of organisational catalysts who are insiders with  
49  
50 outsiders' cultural beliefs (33). In today's workplace, these are colleagues at every  
51  
52 level of power and leadership acting to call out insults and affronts, eliminate pay and  
53  
54 promotion disparities, and advocate for policies that retain a diverse talent pool. Male  
55  
56  
57  
58  
59  
60

1  
2  
3 surgeon colleagues who already mentor and support females are appreciated, but  
4  
5 women, also need to step up and promote themselves (34). The glass ceiling for  
6  
7 women in science is created by people, of either gender, and it can only be broken if  
8  
9 all are aware of it and change their behaviour and attitude towards it.

### 11 **Limitations**

12  
13  
14 The representativeness and transferability of the results are hindered by the  
15  
16 response of the participants to a social media requests through ASGBI, therefore the  
17  
18 findings are reflective of professionals active on social media and might not be  
19  
20 representative of the entire female surgical workforce in the UK. Furthermore, those  
21  
22 who experienced gender inequalities might have been more likely to answer, with a  
23  
24 selection bias, or those who were replying may have had recall bias based on the  
25  
26 nature of the questions.  
27  
28

29  
30 Not all participants filled in the free text boxes and the themes constructed from the  
31  
32 written data are the researchers' interpretations of the written responses. Since it  
33  
34 was an online survey, it was not possible to probe to gain a deeper understanding of  
35  
36 the comments  
37  
38

### 39 **Recommendations**

40  
41  
42 The survey posits a current theme of constraints for women working within surgical  
43  
44 practice in the UK. The findings should be explored further in National and  
45  
46 International Collaborative research for women working in surgery. Interviews and  
47  
48 focus groups as methods of data collection would allow participants to speak about  
49  
50 their experiences and perspectives in greater detail. A consensus conference, with  
51  
52 the guidance and support of regulatory and educational bodies such as ASGBI,  
53  
54  
55  
56  
57  
58  
59  
60

could fully explore the barriers faced and work together to produce targeted action plans to address the barriers described.

#### Authors' contributions:

Maria Irene Bellini designed the study, wrote the article, searched the literature and interpreted the data; Catherine Hayes and Yitka Graham performed the analysis, wrote the article and interpreted the data; Roxanna Zakeri wrote the article and interpreted the data; Rowan Parks and Vassilios Papalois conceptualized the study, wrote the article, interpreted the data and are the senior authors and executive of the ASGBI.

Conflict of interest: none

Funding source: This work was supported by the Association of Surgeons of Great Britain and Ireland (ASGBI)

#### Data sharing statement

The data used to support the findings of this study are included within the article.

#### References

1. Royal College of Surgeons of England. Statistics. <http://surgicalcareers.rcseng.ac.uk/wins/statistics>
2. Taylor KS, Lambert TW, Goldacre MJ. Career progression and destinations, comparing men and women in the NHS: postal questionnaire surveys. *BMJ (Clinical research ed)*. 2009;338:b1735.
3. IET. the Institution of Engineering and Technology. Statistics. <https://www.theiet.org/index.cfm>.
4. Lavy V SE. On The Origins of Gender Human Capital Gaps: Short and Long Term Consequences of Teachers' Stereotypical Biases. *BER Program(s):Children, Economics of Education, Labor Studies*. 2015.
5. Goldacre MJ, Laxton L, Harrison EM, Richards JM, Lambert TW, Parks RW. Early career choices and successful career progression in surgery in the UK: prospective cohort studies. *BMC surgery*. 2010;10:32.
6. Hampton T, Greenhalgh R, Ryan D, Das-Purkayastha P. Female surgical trainee attrition. *The Bulletin of the Royal College of Surgeons of England*. 2016;98(3):134-7.
7. Villwock JA, Sobin LB, Koester LA, Harris TM. Impostor syndrome and burnout among American medical students: a pilot study. *International journal of medical education*. 2016;7:364-9.
8. Khalil R, Moustafa AA, Moftah MZ, Karim AA. How Knowledge of Ancient Egyptian Women Can Influence Today's Gender Role: Does History Matter in Gender Psychology? *Frontiers in psychology*. 2016;7:2053.
9. Crawford E. *Women And The First World War: The Work Of Women Doctors*. Ancestors. 2006.

10. Michel R. Subjective personal introspection in action-oriented research. *Qualitative Research in Organizations and Management: An International Journal*. 2011;6(1):6-25.
11. Association of Surgeons of Great Britain and Ireland (ASGBI) Women in Surgery facebook group <https://www.facebook.com/groups/1607275052681036/>.
12. Braun V, Clarke V. Using thematic analysis in psychology. *Qualitative Research in Psychology*. 2006;2(2):77-101.
13. Salles A, Milam L, Cohen G, Mueller C. The relationship between perceived gender judgment and well-being among surgical residents. *American journal of surgery*. 2018;215(2):233-7.
14. Dzau VJ, Kirch DG, Nasca TJ. To Care Is Human - Collectively Confronting the Clinician-Burnout Crisis. *N Engl J Med*. 2018;378(4):312-4.
15. Yeo HL, Abelson JS, Symer MM, Mao J, Michelassi F, Bell R, et al. Association of Time to Attrition in Surgical Residency With Individual Resident and Programmatic Factors. *JAMA surgery*. 2018.
16. McNally S. Surgical Training: Still Highly Competitive But Still Very Male. *The Bulletin of the Royal College of Surgeons of England*. 2012;94(2):53-5.
17. Parsons BA, Blencowe NS, Hollowood AD, Grant JR. Surgical Training: The Impact of Changes in Curriculum and Experience. *Journal of surgical education*. 68(1):44-51.
18. Itum DS, Oltmann SC, Choti MA, Piper HG. Access to paid parental leave for academic surgeons. *The Journal of surgical research*. 2018.
19. Lambert TW, Smith F, Goldacre MJ. Combining parenthood with a medical career: questionnaire survey of the UK medical graduates of 2002 covering some influences and experiences. *BMJ open*. 2017;7(8):e016822.
20. Equality Challenge Unit. About ECU's Athena SWAN Charter. <http://www.ecu.ac.uk/equality-charters/athena-swan/about-athena-swan>.
21. Perrin A. Social Media Usage 2008-2015. Pew Research Center. 2015.
22. Bellini MI, Marson L. You cannot be what you cannot see. The journey through surgical training from a female perspective. *Journal of the Associations of surgeons of Great Britain and Ireland*. 2017;50:97-9.
23. Harris CA, Blencowe N, Telem D. Response: "Gender Fair Language Matters?". *Annals of surgery*. 2018.
24. Bellini MI. Women in Surgery ASGBI facebook group: an update. *Journal of the Associations of surgeons of Great Britain and Ireland*. 2017;51:99-101.
25. Wilkes M, Feldman MD. Mentoring clinical trainees: a need for high touch. *Lancet (London, England)*. 2017;389(10065):135-7.
26. Lambert T, Surman G, Goldacre M. UK doctors and equal opportunities in the NHS: national questionnaire surveys of views on gender, ethnicity and disability. *Journal of the Royal Society of Medicine*. 2014;107(10):398-408.
27. Koven S. Letter to a Young Female Physician. *The New England journal of medicine*. 2017;376(20):1907-9.
28. Wallis CJ, Ravi B, Coburn N, Nam RK, Detsky AS, Satkunasivam R. Comparison of postoperative outcomes among patients treated by male and female surgeons: a population based matched cohort study. *BMJ (Clinical research ed)*. 2017;359:j4366.
29. Tsugawa Y, Jena AB, Figueroa JF, Orav EJ, Blumenthal DM, Jha AK. Comparison of Hospital Mortality and Readmission Rates for Medicare Patients Treated by Male vs Female Physicians. *JAMA internal medicine*. 2017;177(2):206-13.
30. Philip NC, Matt LH. Working for the Woman? Female Managers and the Gender Wage Gap. *American Sociological Review*. 2007;72(5):681-704.
31. P Ingram TS. Institutional and Resource Dependence Determinants of Responsiveness to Work-Family Issues. *The Academy of Management Journal*. 1995;38(5):1466-82.
32. V Hunt DL, S Prince. *Why Diversity Matters*. McKinsey & Company. 2015.

- 1  
2  
3 33. Meyerson D TD. Tempered radicals as institutional change agents: the case of advancing  
4 gender equity at the University of Michigan. Harvard Journal of Law & Gender. 2007;30.  
5 34. Raymond J. Sexist attitudes: Most of us are biased. Nature. 2013;495(7439):33-4.  
6  
7  
8  
9  
10  
11  
12  
13  
14  
15  
16  
17  
18  
19  
20  
21  
22  
23  
24  
25  
26  
27  
28  
29  
30  
31  
32  
33  
34  
35  
36  
37  
38  
39  
40  
41  
42  
43  
44  
45  
46  
47  
48  
49  
50  
51  
52  
53  
54  
55  
56  
57  
58  
59  
60

For peer review only

# BMJ Open

## **A woman's place is in theatre: women's perceptions and experiences of working in surgery from the Association of Surgeons of Great Britain and Ireland Women in Surgery working group.**

|                                 |                                                                                                                                                                                                                                                                                                                                                                                                                                                                                                                                                                                                                                                                                                                                                                                                                                      |
|---------------------------------|--------------------------------------------------------------------------------------------------------------------------------------------------------------------------------------------------------------------------------------------------------------------------------------------------------------------------------------------------------------------------------------------------------------------------------------------------------------------------------------------------------------------------------------------------------------------------------------------------------------------------------------------------------------------------------------------------------------------------------------------------------------------------------------------------------------------------------------|
| Journal:                        | <i>BMJ Open</i>                                                                                                                                                                                                                                                                                                                                                                                                                                                                                                                                                                                                                                                                                                                                                                                                                      |
| Manuscript ID                   | bmjopen-2018-024349.R2                                                                                                                                                                                                                                                                                                                                                                                                                                                                                                                                                                                                                                                                                                                                                                                                               |
| Article Type:                   | Research                                                                                                                                                                                                                                                                                                                                                                                                                                                                                                                                                                                                                                                                                                                                                                                                                             |
| Date Submitted by the Author:   | 17-Oct-2018                                                                                                                                                                                                                                                                                                                                                                                                                                                                                                                                                                                                                                                                                                                                                                                                                          |
| Complete List of Authors:       | Bellini, Maria Irene; Imperial College Healthcare NHS Trust, Renal Transplant Directorate<br>Graham, Yitka; University of Sunderland Department of Pharmacy Health and Well-being, Science Complex; Sunderland Royal Hospital, Directorate of General Surgery, Bariatric Surgical Unit<br>Hayes, Catherine; University of Sunderland, Faculty of Health Sciences and Wellbeing<br>Zakeri, Roxanna; University College London Hospitals NHS Foundation Trust, General Surgery<br>Parks, Rowan; Royal Infirmary of Edinburgh, Directorate of General Surgery, Hepatobiliary-Pancreatic Surgical Services ; University of Edinburgh Division of Health Sciences, Clinical Surgery<br>Papalois, Vassilios; Imperial College Healthcare NHS Trust, Renal Transplant Directorate; Imperial College London Department of Surgery and Cancer |
| <b>Primary Subject Heading</b>: | Surgery                                                                                                                                                                                                                                                                                                                                                                                                                                                                                                                                                                                                                                                                                                                                                                                                                              |
| Secondary Subject Heading:      | Health policy                                                                                                                                                                                                                                                                                                                                                                                                                                                                                                                                                                                                                                                                                                                                                                                                                        |
| Keywords:                       | SURGERY, gender equity, surgical career, STEM                                                                                                                                                                                                                                                                                                                                                                                                                                                                                                                                                                                                                                                                                                                                                                                        |
|                                 |                                                                                                                                                                                                                                                                                                                                                                                                                                                                                                                                                                                                                                                                                                                                                                                                                                      |

SCHOLARONE™  
Manuscripts

**Title:** A woman's place is in theatre: women's perceptions and experiences of working in surgery from the Association of Surgeons of Great Britain and Ireland Women in Surgery working group.

**Authors:**

Maria Irene Bellini<sup>1</sup> PhD, FEBS, Post CCT Transplant Fellow [mariairene.bellini@nhs.net](mailto:mariairene.bellini@nhs.net)

Yitka Graham<sup>2,3</sup>, PhD, Senior Lecturer in Health Services and NHS Engagement and Researcher in Bariatric Surgery [Yitka.Graham@sunderland.ac.uk](mailto:Yitka.Graham@sunderland.ac.uk)

Catherine Hayes<sup>2</sup>, PhD, MSc, Reader in Health Professions Pedagogic Practice and Visiting Professor in Higher Education at Universities of Cumbria and Liverpool Hope

[Catherine.hayes@sunderland.ac.uk](mailto:Catherine.hayes@sunderland.ac.uk)

Roxanna Zakeri<sup>4</sup>, MBBS, MA (Hons) MRCS, General Surgery Specialty Registrar [roxanna.zakeri@nhs.net](mailto:roxanna.zakeri@nhs.net)

Rowan Parks<sup>5,6</sup>, MD, MB BCh BAO, FRCSI, FRCSEd, Professor of Surgical Sciences Royal Infirmary of Edinburgh [r.w.parks@ed.ac.uk](mailto:r.w.parks@ed.ac.uk)

Vassilios Papalois<sup>1,7</sup> KJSJ, MD, PhD, FICS, FRCS, FEBS, Professor of Transplantation [vassilios.papalois@nhs.net](mailto:vassilios.papalois@nhs.net)

1. Renal and Transplant Directorate, Hammersmith Hospital, Imperial College Healthcare NHS Trust, London UK
2. Faculty of Health Sciences and Wellbeing, University of Sunderland, Sciences Complex, Chester Road Sunderland, UK
3. Directorate of General Surgery, Bariatric Surgical Unit, Sunderland Royal Hospital, Sunderland, Kayll Road, Sunderland, UK
4. Department of General Surgery, University College London Hospital NHS Foundation Trust, London, UK
5. Directorate of General Surgery, Hepatobiliary-Pancreatic Surgical Services Royal Infirmary of Edinburgh
6. Department of Clinical Surgery, University of Edinburgh, Edinburgh UK



1  
2  
3 7. Department of Surgery and Cancer, Imperial College London, London UK  
4  
5  
6

7 **Corresponding author:**

8 Maria Irene Bellini, Renal and Transplant Directorate, Hammersmith Hospital, Imperial  
9 College Healthcare NHS Trust, London, UK. Email: [Mariairene.bellini@nhs.net](mailto:Mariairene.bellini@nhs.net) ,  
10 Telephone: 0203 3135165  
11  
12  
13

14 **Abbreviations**

15  
16  
17  
18 ASGBI: Associations of Surgeons of Great Britain and Ireland

19 CCT: Certificates of Completion of Training

20  
21 CV: Curriculum Vitae

22  
23 LTFT: Less Than Full Time

24  
25 STEM: Science, Technology, Engineering and Mathematics

26  
27 WHO: World Health Organization  
28  
29  
30  
31

32 **Keywords:** surgery, gender equity, surgical career, STEM  
33

34 **Abstract Word count 300**

35  
36  
37 **Objective:** Surgery remains an inherently male-dominated profession. The aim of this  
38 study was to survey women working within the discipline, to understand their current  
39 perceptions, providing insight into their practical day-to-day lives, supporting an action-  
40 oriented change.  
41  
42  
43  
44  
45  
46  
47

48 **Design and Setting:** The link to a confidential, on-line survey was distributed through the  
49 Association of Surgery of Great Britain and Ireland (ASGBI) social media platforms on  
50 Facebook and Twitter over a two-week period in October 2017.  
51  
52  
53  
54  
55  
56  
57  
58  
59  
60

1  
2  
3 **Participants:** Women working in surgical specialties and actively responding to the link  
4 shared through the ASGBI social media platforms. No patients were involved in the study.  
5  
6  
7

8  
9  
10 **Primary and Secondary Outcome measures:** Data were analysed through a mixed  
11 methods approach. The quantitative data was analysed through descriptive statistics and  
12 qualitative analysis was undertaken using a constant comparative analysis of the  
13 participants' comments, to identify salient patterns (themes).  
14  
15  
16  
17

18  
19  
20  
21 **Results:** A total of 81 female participants replied (42% response rate based on the  
22 Facebook group members), with 88% (n=71) perceiving surgery as a male-dominated  
23 field. Over half had experienced discrimination (59%, n=47), whilst 22% (n=18) perceived  
24 a 'glass ceiling' in surgical training. Orthopaedics was reported as the most sexist surgical  
25 specialty by 53% (n=43). Accounts of gendered language in the workplace were reported  
26 by 59% (n=47), with 32% (n=25) of surveys participants having used it. Overall, a lack of  
27 formal mentorship, inflexibility towards part-time careers, gender stereotypes and poor  
28 work-life balance were the main perceived barriers for women in surgical careers.  
29  
30  
31  
32  
33  
34  
35  
36  
37  
38  
39  
40  
41

42 **Conclusion:** These findings highlight the implicit nature of the perceived discrimination  
43 that women report in their surgical careers. The ASGBI acknowledges these perceptual  
44 issues and relative implications as the first of many steps to create an action-oriented  
45 change by allowing all staff, regardless of gender, to reflect on their own behaviour,  
46 perceptions and the culture in which they work.  
47  
48  
49  
50  
51  
52  
53

54 **Trial registration:** not applicable  
55  
56  
57  
58  
59  
60

## Strengths and limitations of the study:

- This study adopted a multiple methods approach with the qualitative elements enriching the quantitative data on the topics addressed.
- The nature of the survey allowed critical introspection with a useful insight to create the action-oriented change.
- The representativeness and transferability of the data are hindered by the probability that women who had encountered discrimination were more likely to respond to this survey.
- As an online survey, it was not possible to probe to gain a deeper understanding of the comments.

## Article Word count 4251

### Introduction

Despite annual intakes of medical school cohorts evidencing a 55% female contingent, only 28% of these women eventually pursue a career in surgery via higher surgical training in the UK (1). Beyond these baseline figures, a qualitative analysis of the factors deterring women from pursuing surgery as a career in the western countries is needed to understand more in depth the nature of these hidden barriers (2).

In reality, several extraneous variables rooted in socio-cultural backgrounds, such as toy-makers sometimes blatantly but more often inadvertently, discourage girls from studying

1  
2  
3 science, technology, engineering and mathematics (STEM) (3), as do some of their  
4 teachers (4, 5). It is evident that some girls lack role models in these fields and grow up  
5 with the unfounded pre-supposition they would not do well in those, considered male and  
6 technical professions (6). This ultimately influences their intrinsic motivation and their  
7 resultant capacity to succeed in fields like surgery, due to the perception that these  
8 careers require self-selected individuals who are driven, competitive, and able to endure  
9 years of intense schooling and high expectations (7).

10  
11 Although there is acknowledgement of the longstanding historical contribution to surgical  
12 practice from women (8, 9) the manner in which women feel perceived by their male  
13 counterparts is under-evidenced and little reported. The key aim of this study is then to  
14 capture the perceived barriers in the experiences of women working within the field of  
15 surgery and to use them as a source of reflection for surgical staff of either gender, for  
16 policy makers and for professional bodies such as the Association of Surgeons of Great  
17 Britain and Ireland (ASGBI). Acknowledging these issues is the first of many steps to  
18 addressing their implication and to help moving beyond tokenism in the co-construction  
19 of relevant, impactful and evidence-based action(10).

## 43 **Methods**

44 The link to a voluntary, confidential, on-line survey was distributed through the ASGBI  
45 Women in Surgery social media platforms of Facebook (191 members) and shared via  
46 Twitter for a two week period in October 2017. Weekly reminders were posted. The  
47 Facebook site (11) is a closed group comprised of healthcare professionals working in  
48 the field of surgery. It is mainly composed by women (90%), aged between 25-34 years

1  
2  
3 (39%) and 35-44 years (30%). The main origin country is the UK (70%), with also  
4 contribution from India, Pakistan, USA, Europe and Africa.  
5  
6

7  
8  
9 The questions were designed to understand whether barriers exist to deter women from  
10 pursuing surgery as a career, and if so, what these barriers are and what interventions  
11 would be suggested in order to reduce them. Respondents were encouraged to provide  
12 their personal opinions throughout the free text boxes after each question. As the aim of  
13 the research was to obtain as many responses as possible, whilst understanding the  
14 participants' experiences of being a female working in surgery, a mixed methods  
15 approach was used. The quantitative data was analysed through descriptive statistics,  
16 and to provide context to this data and more fully explore the participants' responses, a  
17 qualitative approach was taken using constant comparative analysis of the participants'  
18 comments, to identify patterns (themes) within the responses. This was guided by the  
19 principles of thematic analysis (12), using a six step process of data familiarisation,  
20 generating initial codes, searching for themes, reviewing themes, defining and naming  
21 themes and producing the report.  
22  
23  
24  
25  
26  
27  
28  
29  
30  
31  
32  
33  
34  
35  
36  
37  
38  
39

40 ASGBI Ethical Committee approved this study. Given the sensitivity of the topic, the  
41 closed access to the social media platforms, and the wish to ensure honest, open  
42 responses and anonymity, no demographic information was collected.  
43  
44  
45  
46  
47  
48  
49  
50

### 51 *Patient and Public Involvement.*

52  
53  
54

55 No patients were involved in the study.  
56  
57  
58  
59  
60

## Results

A total of 81 participants completed the survey, an estimated response rate of 42% based on the Facebook group membership. It was not possible to determine how the Twitter platform influenced response rate.

### *Quantitative Analysis*

The 88% (n=71) felt that surgery remains a male-dominated field, with 59% (n=47) reporting or witnessing discrimination against females in the workplace. The hidden barriers for women reported by 34% (n=28) were that the profession was not conducive to motherhood and family life, with 16% (n=13) citing childcare issues. There was a perception that the surgical profession and culture was male-oriented, conceptualised as an 'old boys club' (16%, n=33) and possessing a masculine attitude and negative bias (13%, n=9). The framework for a career in surgery was reported as lacking flexibility and part-time careers (12%, n=10), with 10% (n=8) citing unsocial hours and working patterns (see Table I).

**Table I Participant-perceived barriers to a career in surgery**

| Barrier                                                                   | Response   |
|---------------------------------------------------------------------------|------------|
| Not a profession conducive with motherhood, family and children           | 34% (n=28) |
| Childcare issues                                                          | 16%(n=13)  |
| 'Old Boys' Club/network                                                   | 16% (n=13) |
| Male attitudes/bias                                                       | 13%(n=11)  |
| Culture of surgery as a masculine field                                   | 12% (n=10) |
| Unconscious bias                                                          | 12%(n=10)  |
| Lack of flexible/part-time training                                       | 12%(n=10)  |
| Unsocial hours/working patterns/rotas                                     | 10%(n=8)   |
| Perceptions by Nurses and Patients that women are not able to be surgeons | 7%(n=6)    |

|                                                        |          |
|--------------------------------------------------------|----------|
| Maternity leave/career break                           | 6%(n=5)  |
| Women are excluded from 'male-only' social events      | 6% (n=5) |
| Women less confident in their abilities                | 5%(n=4)  |
| Lack of female role models                             | 5%(n=4)  |
| Men have more variety in surgical career choices       | 5%(n=4)  |
| Male surgeons behaving inappropriately                 | 4%(n=3)  |
| Patients prefer male surgeons                          | 4%(n=3)  |
| Image of female surgeons as being on par with a nurse  | 2%(n=2)  |
| Perceptions that women will want a less onerous career | 2% (n=2) |
| Social barriers                                        | 2%(n=2)  |
| Barriers are explicit, not hidden                      | 2%(n=2)  |
| Lack of flexibility                                    | 2%(n=2)  |
| Women need to be seen as ruthless in order to succeed  | 2%(n=2)  |
| Women need to pull their weight like a man             | 2%(n=2)  |
| Hard for women to establish a private practice         | n=1      |
| Personal expectations                                  | n=1      |
| Historical/traditional expectations of women           | n=1      |
| No barriers                                            | 4% (n=3) |
| Respondent skipped question                            | 7%(n=6)  |

The concept of a 'glass ceiling' for women within the surgical profession was raised, with 44% (n=36) feeling this did not exist. All 81 participants answered this question, with 21% (n=17) feeling there was a tangible glass ceiling. The remaining 35% (n=28) chose not to comment.

Respondents were also asked if a glass ceiling existed at any particular levels during surgical training, with 9% (n=7) stating that this was evident at all levels; 6% (n=5) referred women underrepresentation at consultant role with different treatment compared to males.

Given the lack of women in surgical careers, participants were asked to comment on why women may be attracted to other clinical specialties. The most frequent responses (26%, n= 21) were quality of life/work-life balance and less unsocial hours (15%, n= 12) (see Table II).

**Table II Benefits of working in non-surgical specialties for women**

|                                                                 |            |
|-----------------------------------------------------------------|------------|
| Quality of life/flexibility/work and life balance               | 26% (n=21) |
| More accepting of part-time/less than full time training (LTFT) | 17% (n=14) |
| Less unsocial hours                                             | 15%(n=12)  |
| More role models/mentoring                                      | 15% (n=12) |
| Accepting of childcare and family commitments                   | 10% (n=8)  |
| Less macho/male attitudes                                       | 7% (n=6)   |
| Less on call                                                    | 7% (n=6)   |
| Less intimidating reputation/less competitive                   | 6% (n=5)   |
| Other                                                           | 21% (n=17) |
| Not sure/don't know                                             | 16% (n=13) |
| Respondent skipped question                                     | 7% (n=6)   |

When asked what could be done to attract more women to the surgical professions, nearly half (42%, n=34) cited improved quality of life, and flexibility in part-time pathways with career and training options (see Table III).

**Table III What could surgery do to attract more women to the profession?**

|                                                              |            |
|--------------------------------------------------------------|------------|
| Flexible training and career options (e.g. part-time, LTFT)  | 42% (n=34) |
| Project a less masculine image/address this                  | 25% (n=20) |
| Improve the work/life balance                                | 18% (n=15) |
| More female mentors/role models                              | 18% (n=15) |
| More team/collaborative approaches                           | 7% (n=6)   |
| Financial support of trainees                                | 6% (n=5)   |
| Remove the perception of the need for PhDs/to be an academic | 3 % (n=3)  |
| Sessional work                                               | 2% (n=2)   |
| More positions in larger cities                              | 2%(n=2)    |
| Less overbooking                                             | 1%(n=2)    |
| More surgical training for medical students                  | 1%(n=1)    |
| Educate surgeons in unconscious bias                         | 1%(n=1)    |
| Nothing                                                      | 3%(n=3)    |
| Don't know/Not sure                                          | 5%(n=5)    |
| Respondent skipped question                                  | 6% (n=5)   |



Although there is existing support for women in surgery, such as Less Than Full Time (LTFT) training and maternity leave, the dearth of women in surgical professions may demonstrate that there is a need for additional support mechanisms. Over 30% of respondents felt that LTFT training was perceived negatively, and this needed to be addressed. There was also a reported need to reduce stigma associated with women taking career breaks (22%, n=18) and to increase understanding of the impact of family on day-to-day activities (18%, n=15) in surgical practice (see Table IV).

**Table IV What other support (aside from LTFT and maternity leave) is needed for women in surgery?**

|                                                                                                         |                |
|---------------------------------------------------------------------------------------------------------|----------------|
| Change the negative perceptions of LTFT                                                                 | 32%<br>(n=26)  |
| Reduce the perceived stigma associated with women who take career breaks                                | 22%<br>(n=18)  |
| Increase understanding of the perceived impact of family on day to day work activities and support this | 18%<br>(n=15)  |
| Encourage men to take LTFT                                                                              | 15%<br>(n=12)  |
| Career break                                                                                            | 13%,<br>(n=11) |
| On site childcare                                                                                       | 7%, (n=6)      |
| More awareness and promotion of rules, regulations and support of gender equality and support for women | 6% (n=5)       |
| Nothing needed                                                                                          | 6% (n=5)       |
| Modular training                                                                                        | 6% (n=5)       |
| Other                                                                                                   | 26%<br>(n=21)  |
| Not sure                                                                                                | 13%,<br>(n=11) |

To further explore the perceptions of a male-dominated surgical culture, participants were asked to list the specialties in which this dominated. More than half (53%, n=43) felt that Trauma and Orthopaedics was a sexist specialty, followed by Cardiothoracic (16%, n=

13) and General Surgery (15%, n=12), with 15% reporting no surgical specialty as being more sexist than another (see Table V).

**Table V Participant reported sexist surgical specialties**

| <b>Surgical specialty</b> | <b>Reponses</b> |
|---------------------------|-----------------|
| Orthopaedics/Trauma       | 53% (n=43)      |
| Cardiothoracic            | 16% (n=13)      |
| General surgery           | 15% (n=12)      |
| Urology                   | 5% (n=4)        |
| None                      | 4% (n=3)        |
| Vascular                  | 4% (n=3)        |
| Neurosurgery              | 4% (n=3)        |
| Hepatobiliary             | n=1             |
| Plastics                  | n=1             |
| All                       | n=1             |
| Leading question          | n=1             |
| Skipped question          | 11% (n=9)       |
| Not sure/don't know       | 15% (n=12)      |

Over half of respondents (58%, n=47) felt that gendered language exists within surgery. A quarter of the respondents confessed to having used gendered language themselves, but over half (52%, n=41) had not used it, with gendered language not affecting career choices for 87% (n=70%). The most common method of challenging gendered language was to speak out/correct and state inappropriate language (30%, n=24), but 18% (n=15) had not encountered any incidences (see Table VI).

**Table VI Challenging sexist language in the workplace**

| <b>Action</b>                                         | <b>Response</b> |
|-------------------------------------------------------|-----------------|
| Speaking up/correcting/stating inappropriate language | 30% (n=24)      |
| Not experienced sexist language                       | 18% (n=15)      |
| Humour                                                | 9% (n=7)        |

|                                           |          |
|-------------------------------------------|----------|
| Find it difficult                         | 7% (n=6) |
| Non-confrontational approach/social media | 2% (n=2) |
| Not able to interpret response            | 10%(n=8) |
| Ignore/refuse to respond                  | 7%(n=6)  |

When asked what advice they would give to others when encountering gendered language, the most common recommendation was to confront or speak to the person (51%, n=41), with 17% (n=14) advising correction of the language used (see Table VII).

**Table VII Advice to colleagues on dealing with sexist language in workplace environments**

| Advice                                                                                                                                                | Response   |
|-------------------------------------------------------------------------------------------------------------------------------------------------------|------------|
| Confront/speak to person involved                                                                                                                     | 51% (n=41) |
| Correct the language used                                                                                                                             | 17%(n=14)  |
| Respondent did not answer                                                                                                                             | 12% (n=10) |
| Deflect using humour                                                                                                                                  | 11% (n=9)  |
| Do not accept/remains silent                                                                                                                          | 10%(n=8)   |
| Ignore                                                                                                                                                | 9% (n=7)   |
| Be aware that people may not be aware they are using sexist language/don't make an issue out of it (unless 'over the line')/don't be overly sensitive | 7% (n=6)   |
| Seek support from others/support others                                                                                                               | 7% (n=6)   |
| File complaint                                                                                                                                        | 3% (n=2)   |
| Demand apology                                                                                                                                        | n=1        |
| Treat as bullying                                                                                                                                     | n=1        |
| Don't know/no advice                                                                                                                                  | 4% (n=3)   |

### ***Thematic Analysis***

There was an overarching theme of participants feeling constrained within the present surgical environment, which appears to be better equipped to support males, with sociocultural norms embedded in masculine discourses. The participants appeared to make efforts to fit into the environment, adapting a variety of stances to do this. The constraints were conceptualised as conflicting personal and career decisions, under-

1  
2  
3 representation, a relative rigidity in surgical career structures, and the process of  
4  
5 discrimination, both active and nuanced (self and others), that exists in current surgical  
6  
7 practice. These themes are supported by in-vivo quotes from the data:  
8  
9

### 10 **Conflict between personal and career decisions**

11  
12  
13  
14 *'Trainees have families and other responsibilities to manage as well as*  
15 *surgical training '*

16  
17 *'At registrar level, many women switch to GP training for family reasons'*

18  
19  
20 *'Maybe there is a glass ceiling, as the training scheme is long. When you want to*  
21 *have a family you are at senior level for jobs. It is harder to stay focused on career*  
22 *and your curriculum vitae (CV). This affects the quality of your CV at interview for*  
23 *consultancy. Somehow, it's easier for wives to follow their surgeon husbands*  
24 *rather than for husbands to follow surgeon wives'*

25  
26  
27  
28 *'I am horrified by the stories of women in the first trimester of pregnancy with*  
29 *morning sickness vomiting several times between procedures during a list, and*  
30 *women in the third trimester doing nights, etc., especially when they want to switch*  
31 *to a less physically intense session'*

### 32 33 34 35 36 **Under-representation**

37  
38  
39  
40 *'Up until recently, there were no women in my sub-specialty'*

41  
42  
43 *'Now that I am a consultant, I feel massively in the minority '*

### 44 45 46 47 **Rigidity in surgical career structures**

48  
49  
50 *'Reduce the hierarchal nature of surgical training; this would improve safety and*  
51 *morale for all'*

52  
53 *'There needs to be a real understanding that having a small child really hinders the*  
54 *ability to do things like extra work that needs to be completed out of hours. If there*  
55  
56  
57  
58  
59  
60

1  
2  
3 was a way to come back into training but have a pause on in counting towards  
4 your time up then there would be less financial and timescale stress'  
5

6 'Flexible training and to stop having such rigid pathways to CCT (Certificates of  
7 Completion of Training), different paths are ok and valid. We also need true  
8 competency based training – some people will complete faster than 5/6 years,  
9 others might need longer. Be more open to time out.'

10  
11 'There's an implicit assumption that surgeons will be able to have their families trail  
12 around the country after them for jobs and fellowships. Realistically this is less  
13 possible for women with professional partners and small children. Women are  
14 presumed to deskill during maternity leave and discouraged from working part-  
15 time.'  
16  
17  
18

### 19 **Discrimination: self**

20  
21  
22 'Generally, women are less confident in their abilities, whereas men are more  
23 confident...often holds females back'

24  
25 'Some women try and take advantage way over expected norms and use it to  
26 bargain for favours which make things worse'  
27  
28  
29  
30

### 31 **Discrimination: others**

32  
33  
34 'People see a glass ceiling, actually you can get in, but you are treated differently,  
35 so really a glass cliff'

36  
37  
38 'You're an unlikely looking orthopod'

39  
40 'I find the surprise and confusion and refusal to believe I'm an orthopod e.g. 'you're  
41 too nice to be an orthopod' and 'that's not something to be proud of' very frustrating'

42  
43  
44 'I recently presented a paper at a plenary session at a UK surgical meeting. I was  
45 the only female presenter. I got equal marks as the top male candidate (announced  
46 at the podium by the head of the society) but the prize was given to the male and  
47 the prize was a tie'

48  
49 'I have done the World Health Organization checklist and then had the comment  
50 'we need to wait for the surgeon' despite having introduced myself as the surgeon'

51  
52  
53 'I got told by another surgeon that he left vascular surgery for plastics because  
54 there were 'too many women surgeons and they caused too much drama'.  
55  
56  
57  
58  
59  
60

1  
2  
3  
4  
5 There were reported accounts of patients using gendered language with implicit  
6 assumptions that female surgeons were not acceptable, or that being female was not  
7  
8 associated with being a surgeon:  
9  
10

11  
12  
13 *'Patients don't think women can be doctors, let alone surgeons'*

14  
15  
16  
17 *'Significantly more patients call me nurse or lady doctor than any of my*  
18  
19 *colleagues'*

20  
21  
22 *'Patients are often shocked that I will be doing their operation, and I have led ward*  
23 *rounds where the patients have talked to my tall male F1 and not me'*

24  
25 *'Patients are extraordinarily sexist e.g. patients have walked into a consulting room*  
26 *and said to me 'I thought I would be seeing a doctor at least' before I had time to*  
27 *introduce myself. I am 34 and been a doctor for 10 years'*  
28

29  
30  
31 Perceived implicit discrimination was reported, but could not be proven:  
32  
33

34 *'I had difficulty trying to get a consultant job. Although I was already working as a*  
35 *locum consultant, I lost out many times to younger men who were all registrars.*  
36 *Various reasons were cited, but I did begin to wonder if my face didn't fit. Until a*  
37 *couple of years ago, there were no women in my particular subspecialty'*  
38

39 *'Improve the stigma that is sometimes attached to women who choose to take time*  
40 *out of their careers for children. Many women I've spoken to say they aren't viewed*  
41 *as competent as their full time colleagues'*  
42

43 *'We lose out on consultant posts to younger males'*  
44  
45

46 In the physical workplace, there was an account of discrimination:  
47  
48

49 *'I am the only female Consultant General Surgeon in my Trust. I'm not allowed in*  
50 *the consultant changing room. There is one consultant changing room and it is for*  
51 *men only'*  
52

53 Accounts of discrimination were supported by other healthcare staff:  
54  
55  
56  
57  
58  
59  
60

1  
2  
3 *'Theatre staff have commented that male surgeons get more opportunities in*  
4 *theatre than female'*  
5

6 There were also reports of female surgeons being discriminated against by other non-  
7 surgical staff:  
8

9 *'The secretaries in my Trust do not do as much for the female consultants as they*  
10 *are perceived as having taken a 'man's job'.'*  
11  
12  
13

## 14 **Discussion**

15 This survey, conducted through the ASGBI social media platforms, illuminates the lived  
16 realities of female surgeons in the UK today. Gender bias and discrimination were  
17 reported by 59% of the participants irrespective of level of training and experience,  
18 suggesting an ancient culture pervading our society since the 1800s, at the time of the  
19 first female surgeon in the UK, Elizabeth Garrett (13, 14).  
20  
21  
22  
23  
24  
25  
26  
27

28 The greatest perceived barrier to women wanting to pursue and persist with a career in  
29 surgery was incongruity with motherhood and childcare commitments (50%). Literature  
30 reports a significant level of attrition for women in surgical training (15), traditionally seen  
31 as one of the most competitive and time-consuming specialties (16) with the perception  
32 that spending less time in surgical training would compromise competency achievement  
33 (17). Furthermore, there is discrepancy on parental leave policies across hospital trusts  
34 and specialties, despite widespread recognition that better support for parents engenders  
35 marked benefits for the health and wellbeing of doctors, their children and ultimately  
36 healthcare provision (18). The general perception is that family-friendliness may be hard  
37 to reconcile with the working requirements of the surgical specialty, often involving patient  
38 treatment of unknown length or at unsocial times of day or night (19). There is a challenge  
39 to manage work in these areas and to improve family-friendliness without compromising  
40 patient care. This lack of support is potentially leading to burnout, since we know that this  
41  
42  
43  
44  
45  
46  
47  
48  
49  
50  
51  
52  
53  
54  
55  
56  
57  
58  
59  
60

1  
2  
3 is ultimately driven by external factors such as excessive working hours, workload and  
4  
5 conflicts with family commitments (13, 14). Thus, for some women, the only perceived  
6  
7 option to preserve their own mental health is represented by withdrawing from surgical  
8  
9 training.  
10

11  
12  
13 How do we create the change needed? Encouraging and tangible signs of an already  
14  
15 emergent cultural change, like day-care facilities and childcare options, are reflected in  
16  
17 the wider societal acknowledgement of women in surgery. One example is the New Year's  
18  
19 Honours List, where the Royal College of Surgeons of England past president, and first  
20  
21 female president, Clare Marx, received a damehood in acknowledgement of her  
22  
23 contribution to surgical practice. In addition to this, Jackie Taylor has been chosen as  
24  
25 president-elect of the Royal College of Physicians and Surgeons of Glasgow for the first  
26  
27 time in its 418-year history, where, for the first time, there is also a female surgical vice-  
28  
29 president, Alison Lannigan. Whilst these women are atypical and not necessarily  
30  
31 representative of all women in surgery, they act as positive role models for women in the  
32  
33 context of career progression. We need strategic encouragement and education about  
34  
35 the realities of leadership roles in STEM, along with instigation of evidence-based and  
36  
37 effective schemes for gender equality in the workplace, such as the ATHENA SWAN for  
38  
39 academic careers (20).  
40  
41  
42  
43  
44

45  
46 Visibility of role models is key to increasing current female training rates and public  
47  
48 advocacy campaigns through social media facilitate education and awareness of  
49  
50 culturally sensitive matters. To this end, the ASGBI launched a Facebook group(11) to  
51  
52 bring individuals together for networking and communications about women in surgery,  
53  
54 parenting and work-life balance (11). As primary communication methods, social media  
55  
56  
57  
58  
59  
60



1  
2  
3 are increasingly integrated into the daily routine of individuals personal activity and  
4 practice, with 68% of women and 62% of men using them (21). We aim to be what we  
5 see or what we deal with in our daily practice (22). The ASGBI  
6  
7  
8  
9  
10 #HowIBecameAWomanInSurgery” campaign was created on this basis to shine light on  
11 the journey through the training pathways of female surgeons. Since much of a culture is  
12 underpinned and shaped by the language used (23), we advocate for a cultural  
13 identification with women becoming surgeons. Sharing the journeys of successful female  
14 surgeons aims to inspire and support other members, allowing them to see how frequently  
15 encountered barriers were overcome from different perspectives(24). Evidence of the  
16 benefits of mentoring to support women as they progress in their careers is plentiful (25).  
17 Interestingly, this survey revealed great awareness of the benefits of mentoring amongst  
18 female surgeons, but a view in 15% that it currently remains an advantage to be gained  
19 primarily in non-surgical specialties. The lack of female role models in surgical leadership  
20 and consultancy positions contribute to the perpetration of the white male stereotypical  
21 gender role, and those who do not fulfil these characteristics, may believe they cannot  
22 make in this environment (22, 26). To address this structural problem, a more diverse  
23 senior team could prevent discrimination against women in surgery favouring their hiring  
24 and promotion.

25  
26  
27  
28  
29  
30  
31  
32  
33  
34  
35  
36  
37  
38  
39  
40  
41  
42  
43  
44  
45 Finally, personality traits and behaviours adopted by surgeons are often perceived  
46 differently depending on a surgeon’s gender, which can have significant impact on an  
47 individual’s confidence and self-reflection. Respondents to this survey noted being  
48 labelled as ruthless in order to succeed (2%), pressured to ‘pull their weight like a man’  
49 (2%) and admitted a lack of confidence in their ability (5%). Women excel in some areas  
50  
51  
52  
53  
54  
55  
56  
57  
58  
59  
60

1  
2  
3 more typically difficult for their male counterparts, including communication, collaboration,  
4 and patient centeredness (27). Recent analysis of over 100,000 surgical patients in  
5  
6 Canada, found that those who were operated on by female surgeons were less likely to  
7  
8 die one month after their procedure (28), mirroring a previous study according to which  
9  
10 female internal medicine doctors had slightly lower rates of death within 30 days of initial  
11  
12 hospitalisation (29). The authors' possible explanation is that the barriers women face in  
13  
14 the surgical environment act as a higher bar to achieve a consultant or leadership role  
15  
16 when compared to their male counterparts. Those data need adequate dissemination  
17  
18 amongst healthcare professionals and general population, as in our survey the glass  
19  
20 ceiling for women is also represented by nurses and patients (7%).  
21  
22  
23  
24  
25

26 This study builds on the global commitment for greater female representation and support  
27  
28 in STEM. The greatest challenge currently faced, in the opinion of the authors, is the  
29  
30 realisation and elimination of unconscious bias existing in surgery. Gender equity is a  
31  
32 leadership issue: when more women are in leadership positions, organisations offer  
33  
34 employees more generous policies to support workplace gender (30, 31) and produce  
35  
36 better business results (32).  
37  
38  
39

40 Cultural change requires a nucleus of organisational catalysts who are insiders with  
41  
42 outsiders' cultural beliefs (33). In today's workplace, these are colleagues at every level  
43  
44 of power and leadership acting to call out insults and affronts, eliminate pay and promotion  
45  
46 disparities, and advocate for policies that retain a diverse talent pool. Male surgeon  
47  
48 colleagues who already mentor and support females are appreciated, but women, also  
49  
50 need to step up and promote themselves (34). The glass ceiling for women in science is  
51  
52  
53  
54  
55  
56  
57  
58  
59  
60

1  
2  
3 created by people, of either gender, and it can only be broken if all are aware of it and  
4  
5 change their behaviour and attitude towards it.  
6

### 7 **Limitations**

8  
9  
10 The representativeness and transferability of the results are hindered by the response of  
11  
12 the participants to a social media requests through ASGBI, therefore the findings are  
13  
14 reflective of professionals active on social media and might not be representative of the  
15  
16 entire female surgical workforce in the UK. Furthermore, those who experienced gender  
17  
18 inequalities might have been more likely to answer, or those who were replying may have  
19  
20 had recall bias based on the nature of the questions.  
21  
22  
23

24  
25 Not all participants filled in the free text boxes and the themes constructed from the  
26  
27 written data are the researchers' interpretations of the written responses. Since it was an  
28  
29 online survey, it was not possible to probe to gain a deeper understanding of the  
30  
31 comments  
32  
33

### 34 **Recommendations**

35  
36  
37 The survey posits a current theme of constraints for women working within surgical  
38  
39 practice in the UK. The findings should be explored further in National and International  
40  
41 Collaborative research for women working in surgery. Interviews and focus groups as  
42  
43 methods of data collection would allow participants to speak about their experiences and  
44  
45 perspectives in greater detail. A consensus conference, with the guidance and support of  
46  
47 regulatory and educational bodies such as ASGBI, could fully explore the barriers faced  
48  
49 and work together to produce targeted action plans to address the barriers described.  
50  
51  
52

53  
54  
55 Authors' contributions:  
56  
57  
58

1  
2  
3 Maria Irene Bellini designed the study, wrote the article, searched the literature and  
4 interpreted the data; Catherine Hayes and Yitka Graham performed the analysis, wrote  
5 the article and interpreted the data; Roxanna Zakeri wrote the article and interpreted the  
6 data; Rowan Parks and Vassilios Papalois conceptualized the study, wrote the article,  
7 interpreted the data and are the senior authors and executive of the ASGBI.  
8  
9

10 Conflict of interest: none  
11

12 Funding source: This work was supported by the Association of Surgeons of Great  
13 Britain and Ireland (ASGBI)  
14  
15

### 16 17 18 Data sharing statement 19

20  
21 The data used to support the findings of this study are included within the article.  
22  
23  
24  
25  
26

### 27 28 29 30 31 32 33 34 35 36 37 38 39 40 41 42 43 44 45 46 47 48 49 50 51 52 53 54 55 56 57 58 59 60

## References

1. Royal College of Surgeons of England. Statistics. <http://surgicalcareers.rcseng.ac.uk/wins/statistics>
2. Taylor KS, Lambert TW, Goldacre MJ. Career progression and destinations, comparing men and women in the NHS: postal questionnaire surveys. *BMJ (Clinical research ed)*. 2009;338:b1735.
3. IET. the Institution of Engineering and Technology. Statistics. <https://www.theiet.org/index.cfm>.
4. Lavy V SE. On The Origins of Gender Human Capital Gaps: Short and Long Term Consequences of Teachers' Stereotypical Biases. BER Program(s):Children, Economics of Education, Labor Studies. 2015.
5. Goldacre MJ, Laxton L, Harrison EM, Richards JM, Lambert TW, Parks RW. Early career choices and successful career progression in surgery in the UK: prospective cohort studies. *BMC surgery*. 2010;10:32.
6. Hampton T, Greenhalgh R, Ryan D, Das-Purkayastha P. Female surgical trainee attrition. *The Bulletin of the Royal College of Surgeons of England*. 2016;98(3):134-7.
7. Villwock JA, Sobin LB, Koester LA, Harris TM. Impostor syndrome and burnout among American medical students: a pilot study. *International journal of medical education*. 2016;7:364-9.
8. Khalil R, Moustafa AA, Moftah MZ, Karim AA. How Knowledge of Ancient Egyptian Women Can Influence Today's Gender Role: Does History Matter in Gender Psychology? *Frontiers in psychology*. 2016;7:2053.
9. Crawford E. Women And The First World War: The Work Of Women Doctors. *Ancestors*. 2006.
10. Michel R. Subjective personal introspection in action-oriented research. *Qualitative Research in Organizations and Management: An International Journal*. 2011;6(1):6-25.
11. Association of Surgeons of Great Britain and Ireland (ASGBI) Women in Surgery facebook group <https://www.facebook.com/groups/1607275052681036/>.
12. Braun V, Clarke V. Using thematic analysis in psychology. *Qualitative Research in Psychology*. 2006;2(2):77-101.

13. Salles A, Milam L, Cohen G, Mueller C. The relationship between perceived gender judgment and well-being among surgical residents. *Am J Surg*. 2018;215(2):233-7.
14. Dzau VJ, Kirch DG, Nasca TJ. To Care Is Human - Collectively Confronting the Clinician-Burnout Crisis. *N Engl J Med*. 2018;378(4):312-4.
15. Yeo HL, Abelson JS, Symer MM, Mao J, Michelassi F, Bell R, et al. Association of Time to Attrition in Surgical Residency With Individual Resident and Programmatic Factors. *JAMA surgery*. 2018.
16. McNally S. Surgical Training: Still Highly Competitive But Still Very Male. *The Bulletin of the Royal College of Surgeons of England*. 2012;94(2):53-5.
17. Parsons BA, Blencowe NS, Hollowood AD, Grant JR. Surgical Training: The Impact of Changes in Curriculum and Experience. *Journal of surgical education*.68(1):44-51.
18. Itum DS, Oltmann SC, Choti MA, Piper HG. Access to paid parental leave for academic surgeons. *The Journal of surgical research*. 2018.
19. Lambert TW, Smith F, Goldacre MJ. Combining parenthood with a medical career: questionnaire survey of the UK medical graduates of 2002 covering some influences and experiences. *BMJ open*. 2017;7(8):e016822.
20. Equality Challenge Unit. About ECU's Athena SWAN Charter. <http://www.ecu.ac.uk/equality-charters/athena-swan/about-athena-swan>.
21. Perrin A. Social Media Usage 2008-2015. Pew Research Center. 2015.
22. Bellini MI, Marson L. You cannot be what you cannot see. The journey through surgical training from a female perspective. *Journal of the Associations of surgeons of Great Britain and Ireland*. 2017;50:97-9.
23. Harris CA, Blencowe N, Telem D. Response: "Gender Fair Language Matters?". *Annals of surgery*. 2018.
24. Baker TB. Living liver donation, donor safety, and social media: Preparing for a new frontier. *Liver transplantation : official publication of the American Association for the Study of Liver Diseases and the International Liver Transplantation Society*. 2017;23(2):131-2.
25. Wilkes M, Feldman MD. Mentoring clinical trainees: a need for high touch. *Lancet (London, England)*. 2017;389(10065):135-7.
26. Lambert T, Surman G, Goldacre M. UK doctors and equal opportunities in the NHS: national questionnaire surveys of views on gender, ethnicity and disability. *Journal of the Royal Society of Medicine*. 2014;107(10):398-408.
27. Koven S. Letter to a Young Female Physician. *The New England journal of medicine*. 2017;376(20):1907-9.
28. Wallis CJ, Ravi B, Coburn N, Nam RK, Detsky AS, Satkunasivam R. Comparison of postoperative outcomes among patients treated by male and female surgeons: a population based matched cohort study. *BMJ (Clinical research ed)*. 2017;359:j4366.
29. Tsugawa Y, Jena AB, Figueroa JF, Orav EJ, Blumenthal DM, Jha AK. Comparison of Hospital Mortality and Readmission Rates for Medicare Patients Treated by Male vs Female Physicians. *JAMA internal medicine*. 2017;177(2):206-13.
30. Philip NC, Matt LH. Working for the Woman? Female Managers and the Gender Wage Gap. *American Sociological Review*. 2007;72(5):681-704.
31. P Ingram TS. Institutional and Resource Dependence Determinants of Responsiveness to Work-Family Issues. *The Academy of Management Journal*. 1995;38(5):1466-82.
32. V Hunt DL, S Prince. *Why Diversity Matters*. McKinsey & Company. 2015.
33. Meyerson D TD. Tempered radicals as institutional change agents: the case of advancing gender equity at the University of Michigan. *Harvard Journal of Law & Gender*. 2007;30.
34. Raymond J. Sexist attitudes: Most of us are biased. *Nature*. 2013;495(7439):33-4.

1  
2  
3  
4  
5  
6  
7  
8  
9  
10  
11  
12  
13  
14  
15  
16  
17  
18  
19  
20  
21  
22  
23  
24  
25  
26  
27  
28  
29  
30  
31  
32  
33  
34  
35  
36  
37  
38  
39  
40  
41  
42  
43  
44  
45  
46  
47  
48  
49  
50  
51  
52  
53  
54  
55  
56  
57  
58  
59  
60

For peer review only
